# Supplementary material for: Massively parallel in vivo CRISPR screening identifies RNF20/40 as epigenetic regulators of cardiomyocyte maturation
Source: PubMed Central journal article supplement (PMC8295283; doi:10.1038/s41467-021-24743-z), 2021-07-21
Supplement: 41467_2021_24743_MOESM1_ESM.pdf [file 41467_2021_24743_MOESM1_ESM.pdf]

**Massively parallel in vivo CRISPR screening identifies RNF20/40 as epigenetic  
regulators of cardiomyocyte maturation**

**Nathan J. VanDusen, et al.**

**SUPPLEMENTARY INFORMATION**

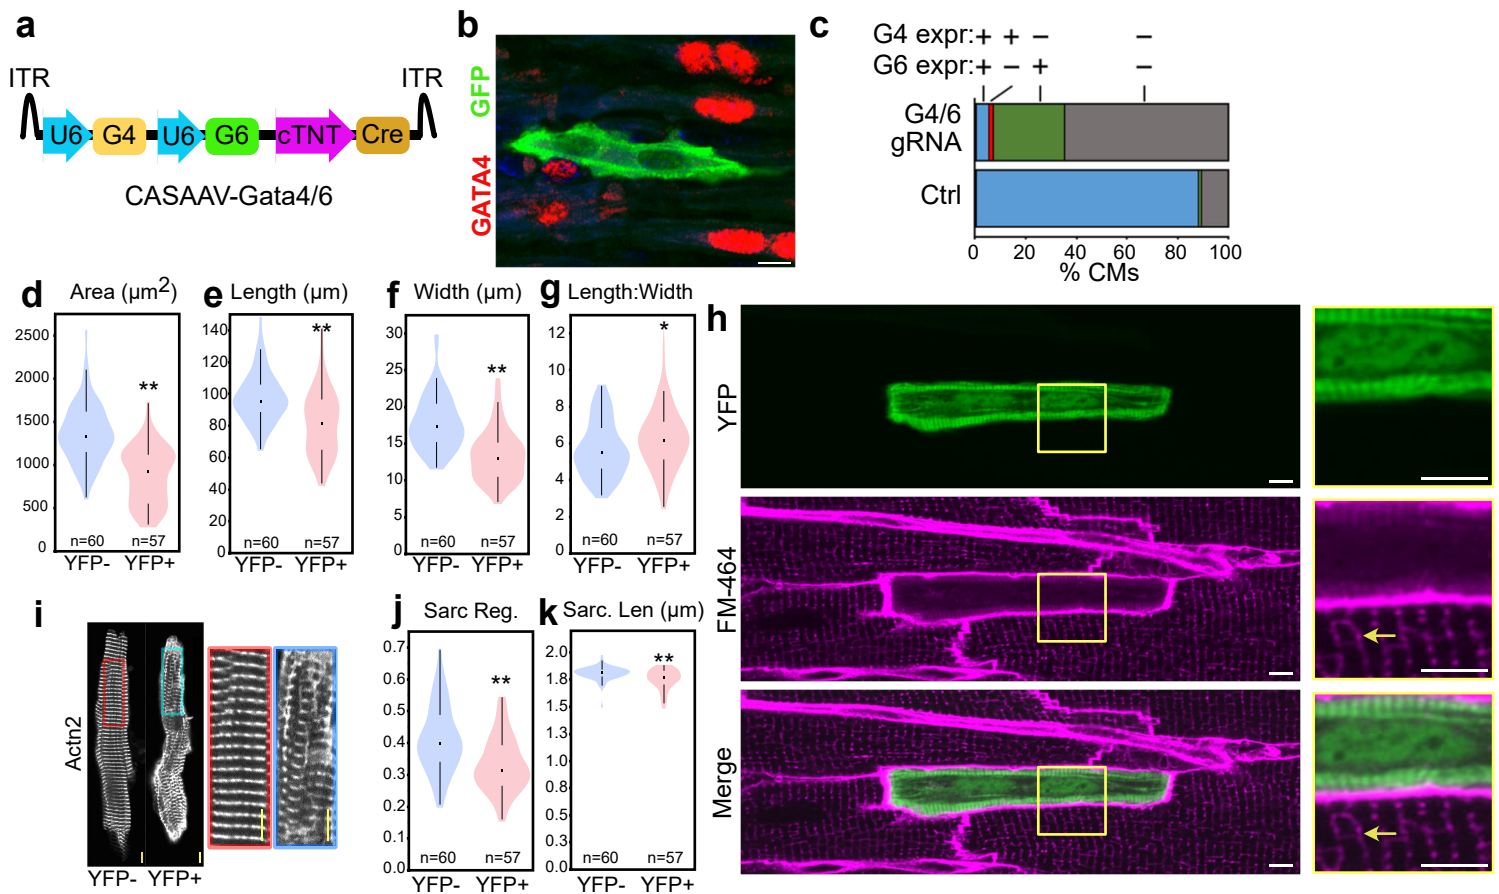

**Suppl. Fig. 1. GATA4 and GATA6 are required for normal CM maturation.** **a.** CASAAV-Gata4/6 vector. AAV genome expresses Cre from the CM selective cardiac troponin T (cTNT) promoter and gRNAs that target *Gata4* and *Gata6*. We administered CASAAV-Gata4/6 at a low dose, to achieve mosaic gene inactivation, to postnatal day 1 (P1) mouse pups carrying Cre-activated Cas9-2A-GFP and *Myh7<sup>YFP</sup>* (R26<sup>Cas9-GFP</sup>; *Myh7<sup>YFP</sup>*). **b.** GATA4 and GATA6 knockout efficiency. We fixed hearts at P10 and performed GATA4 and GATA6 immunostaining (n=3 hearts). Representative section stained for GATA4 is shown. GFP marked transduced CMs. Scale bar = 10  $\mu\text{m}$ . **c.** Quantification of GATA4 and GATA6 depletion. Greater than 90% and 60% of the transduced CMs lost GATA4 and GATA6 immunoreactivity, respectively. **d-g.** Quantitation of size and dimensions in isolated P28 CMs, when maturation is normally largely complete. Transduced CMs expressing the immaturity marker YFP were compared to YFP- CMs from the same heart. YFP+ CMs were much smaller in projected area (d;  $P < 0.0001$ ), due to decreases in both length and width (e-g; length and width  $P < 0.0001$ ; length-to-width  $P = 0.0409$ ). **h.** T-tubulation was assessed by optical sectioning of intact hearts perfused with the plasma membrane binding dye FM4-64. Severe T-tubule defects were observed in YFP+ cells as the lack of internal FM4-64 stained striations, labeled by arrows in control cells (n=3 mice). Scale bars = 5  $\mu\text{m}$ . **i-k.** Sarcomere organization (YFP- n=60 CMs; YFP+ n=57 CMs).  $\alpha$ -actinin (ACTN2) immunostaining of dissociated CMs showed decreased sarcomere regularity within YFP+ CMs, as quantified by AutoTT software. Scale bars = 5  $\mu\text{m}$ . (i,j;  $P < 0.0001$ ). Sarcomere spacing was also decreased in YFP+ cells (k;  $P = 0.0005$ ). Source data are provided as a Source Data file. Violin plots: shape indicates data distribution; point, median; whiskers, starts at quartile and extends 1.5 times the interquartile distance. Two-tailed t-test: \* $P < 0.05$ , \*\* $P < 0.001$ .

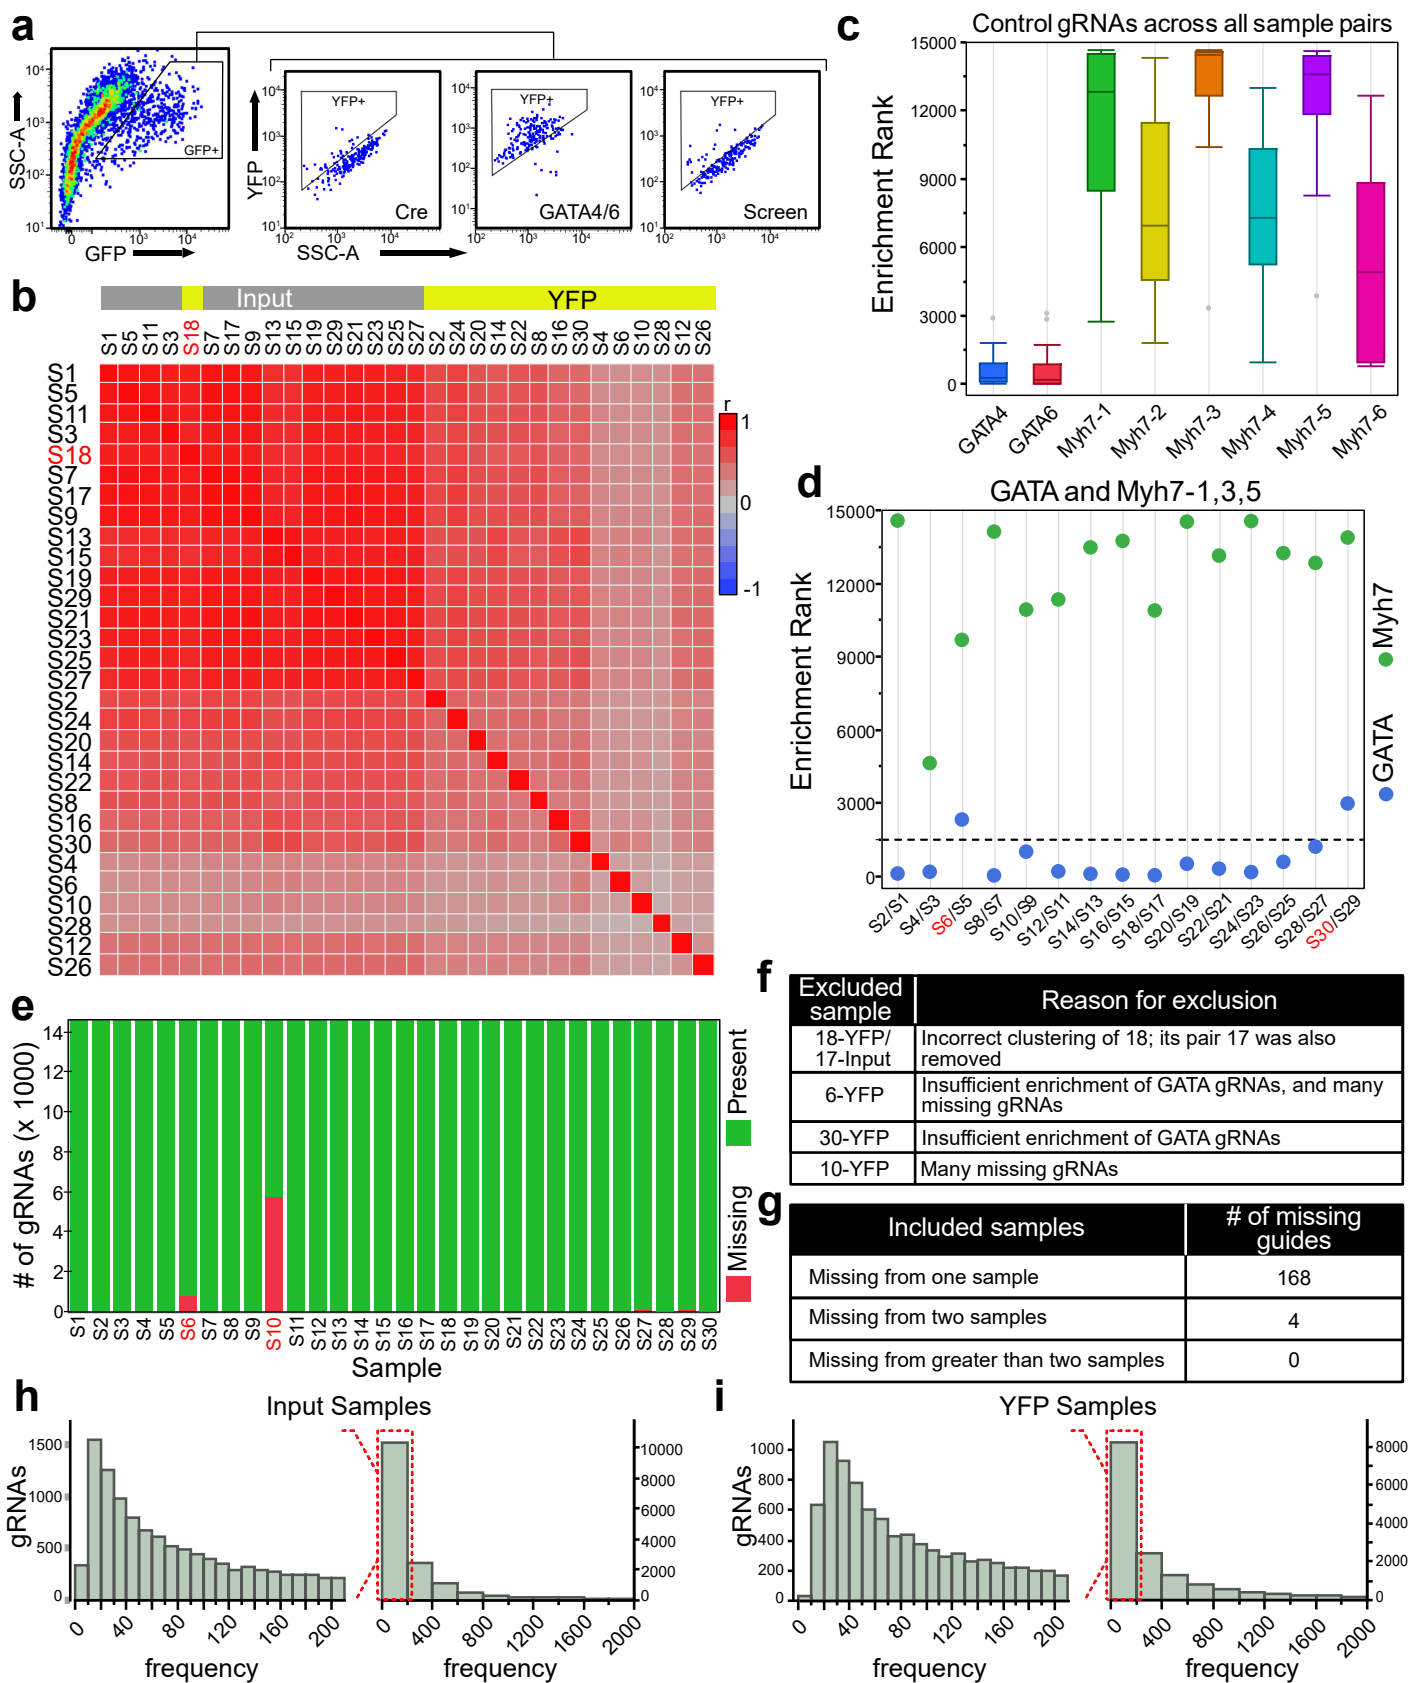

**Suppl. Fig. 2. Quality control of forward genetic screen biological replicates.** **a.** Representative flow cytometry plots. First GFP+ CMs were gated (left panel), and then sorted for YFP expression (right three panels). Cre, negative control. GATA4/6, CASA AV-Gata4\_Gata6 positive control. Screen, representative example of one of the samples in the screen. **b.** gRNA counts were extracted and the enrichment of gRNAs in YFP samples was calculated for each sample pair. S18 is a YFP sample that mis-clustered with the input samples. **c,d.** Enrichment rank (low=most enriched) of positive (Gata4 and Gata6) and negative (Myh7-1 to Myh7-6) control gRNAs across all sample pairs (c; n=15 for each gRNA) and individual sample pairs (d). Box plot center line indicates the median, while boxes show 25th and 75th percentiles. Whiskers denote the maximum observation within the 75th percentile + 1.5 times the interquartile range, or the minimum observation within the 25th percentile - 1.5 times the interquartile range. **e.** gRNA coverage across samples. "Missing" guides were guides with zero reads. S6 and S10 had many missing gRNAs. **f.** Excluded samples and reasons for their exclusion. **g.** Consistency of gRNA detection across all included samples. "Missing" guides were guides with zero reads. **h,i.** Frequency of gRNAs in input (h) and YFP (i) samples. Left panel is a magnification of the first bar in the right panel. Frequency represents median normalized read counts. Source data are provided as a Source Data file.

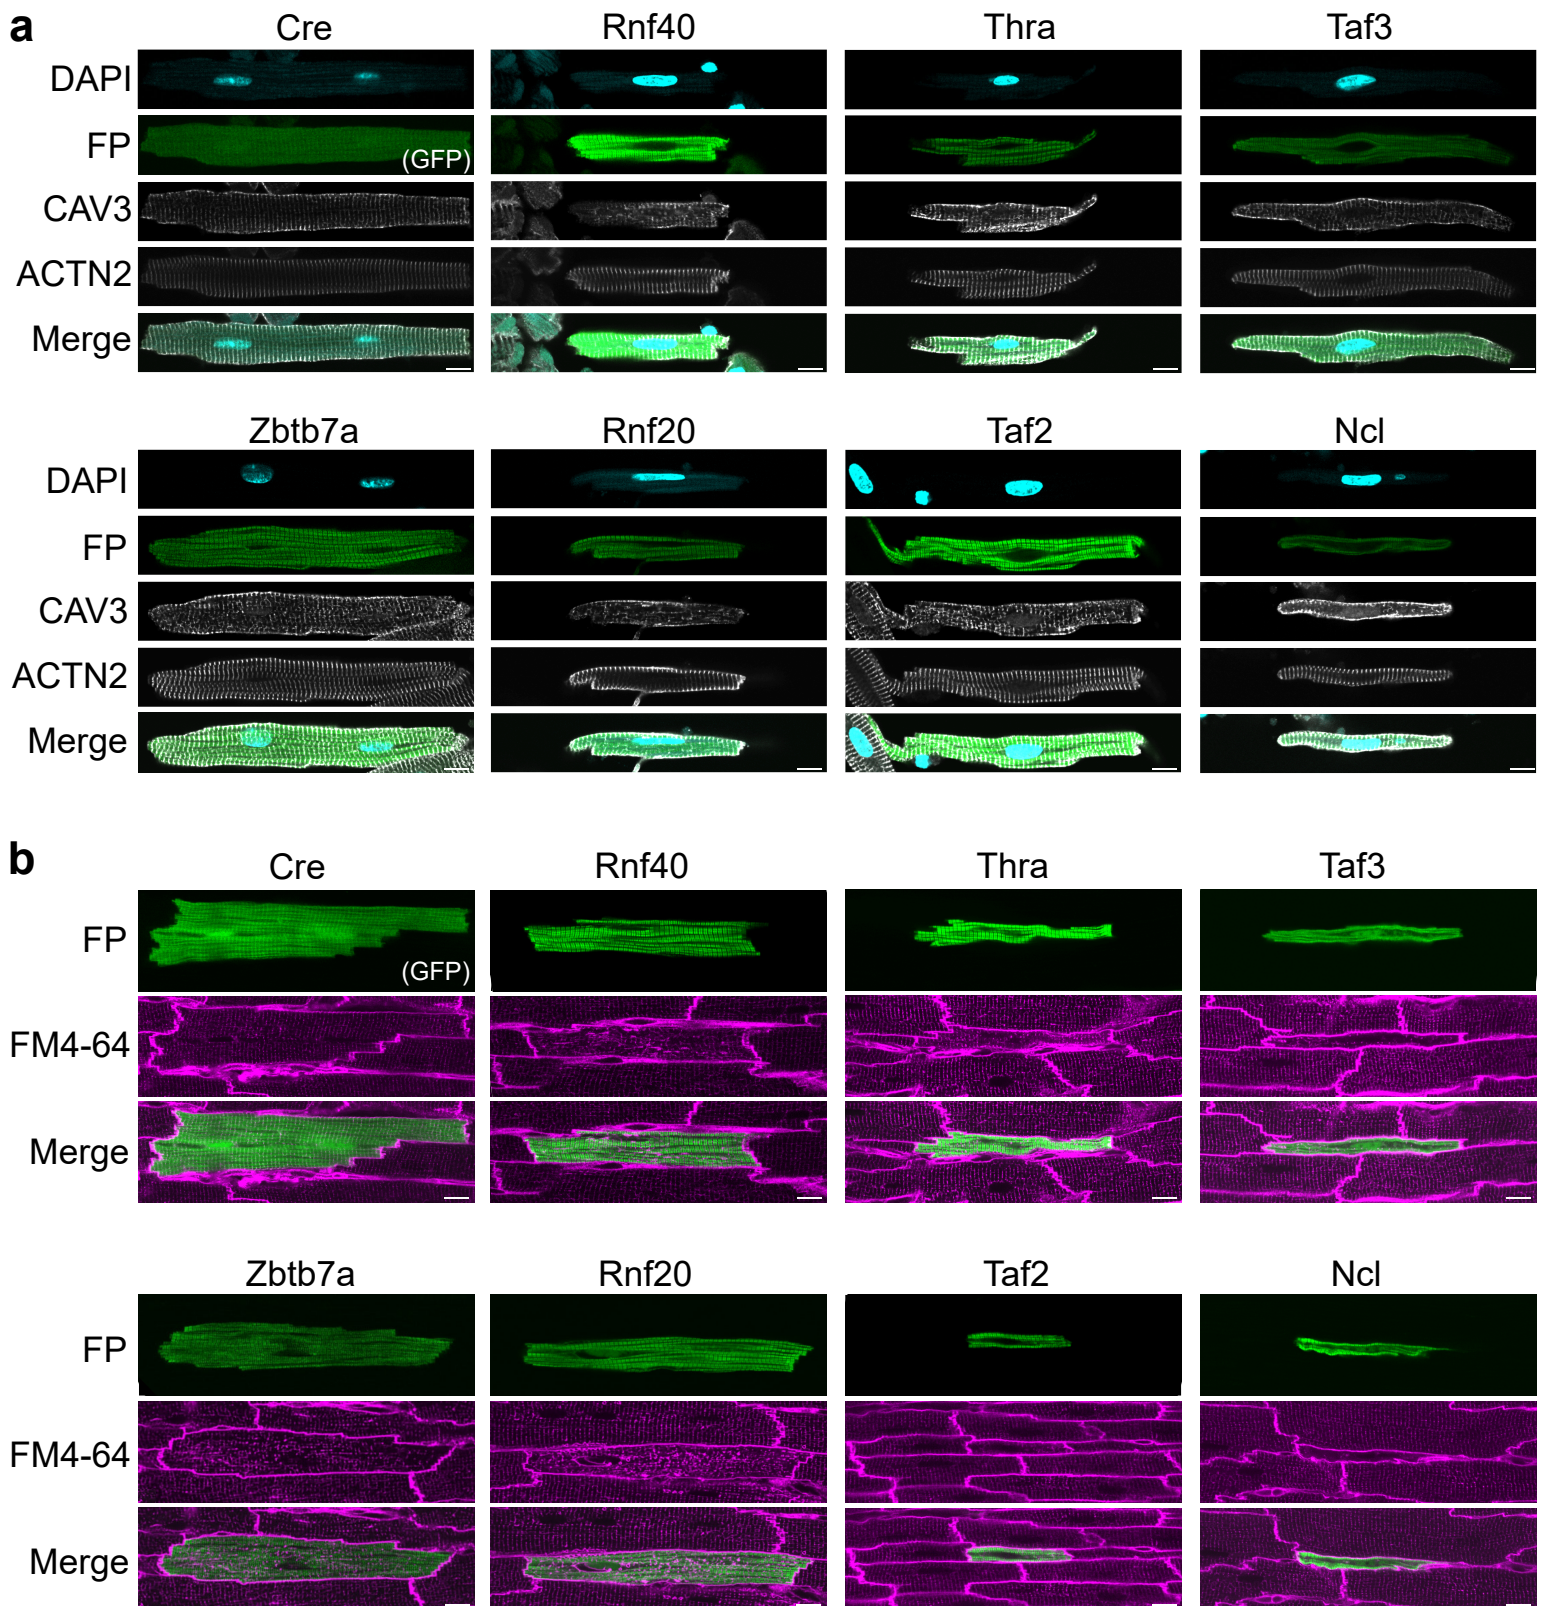

**Suppl. Fig. 3. Validation of genetic screen.** CASA-AV vectors targeting each of the indicated factors, or AAV-Cre negative control, was delivered to neonatal mice at a dose that transduced a low percentage of cardiomyocytes. At P28, hearts were dissociated and isolated CMs were fixed and immunostained. Phenotype of fluorescent protein (FP) positive cells (GFP for AAV-Cre, YFP for CASA-AV vectors) was examined. **a.** Confocal detection of FP, DAPI (nuclei), CAV3 immunostaining (T-tubules), and ACTN2 immunostaining (sarcomere Z-lines; n = 3 mice). **b.** Confocal detection of FP and FM4-64, which stains the sarcolemma and its invaginations, the T-tubules (n=3 mice). Scale bars = 10  $\mu$ m. (continued)

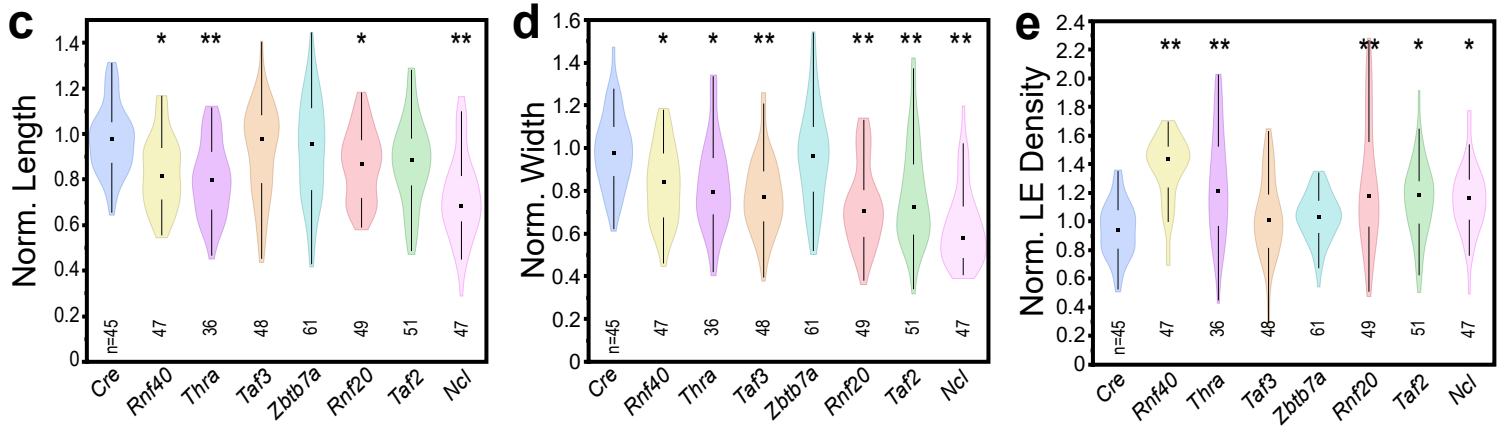

**Suppl. Fig. 3, continued. c-d.** Morphometric measurement of dissociated cardiomyocytes. Neonatal mice were treated with CASA AV targeting the indicated gene, or AAV-Cre control, and cardiomyocytes were dissociated at 4 weeks of life. **e.** Quantification of T-tubule longitudinal element (LE) density. Immature or stressed CMs feature higher LE density. Violin plots in c-e are formatted as described in Figure 2. n=3 mice for c-e, with CM number shown below each distribution. Dunnett's two-tailed t-test vs. Cre control: \* $P < 0.05$ , \*\* $P < 0.001$ . Source data are provided as a Source Data file.

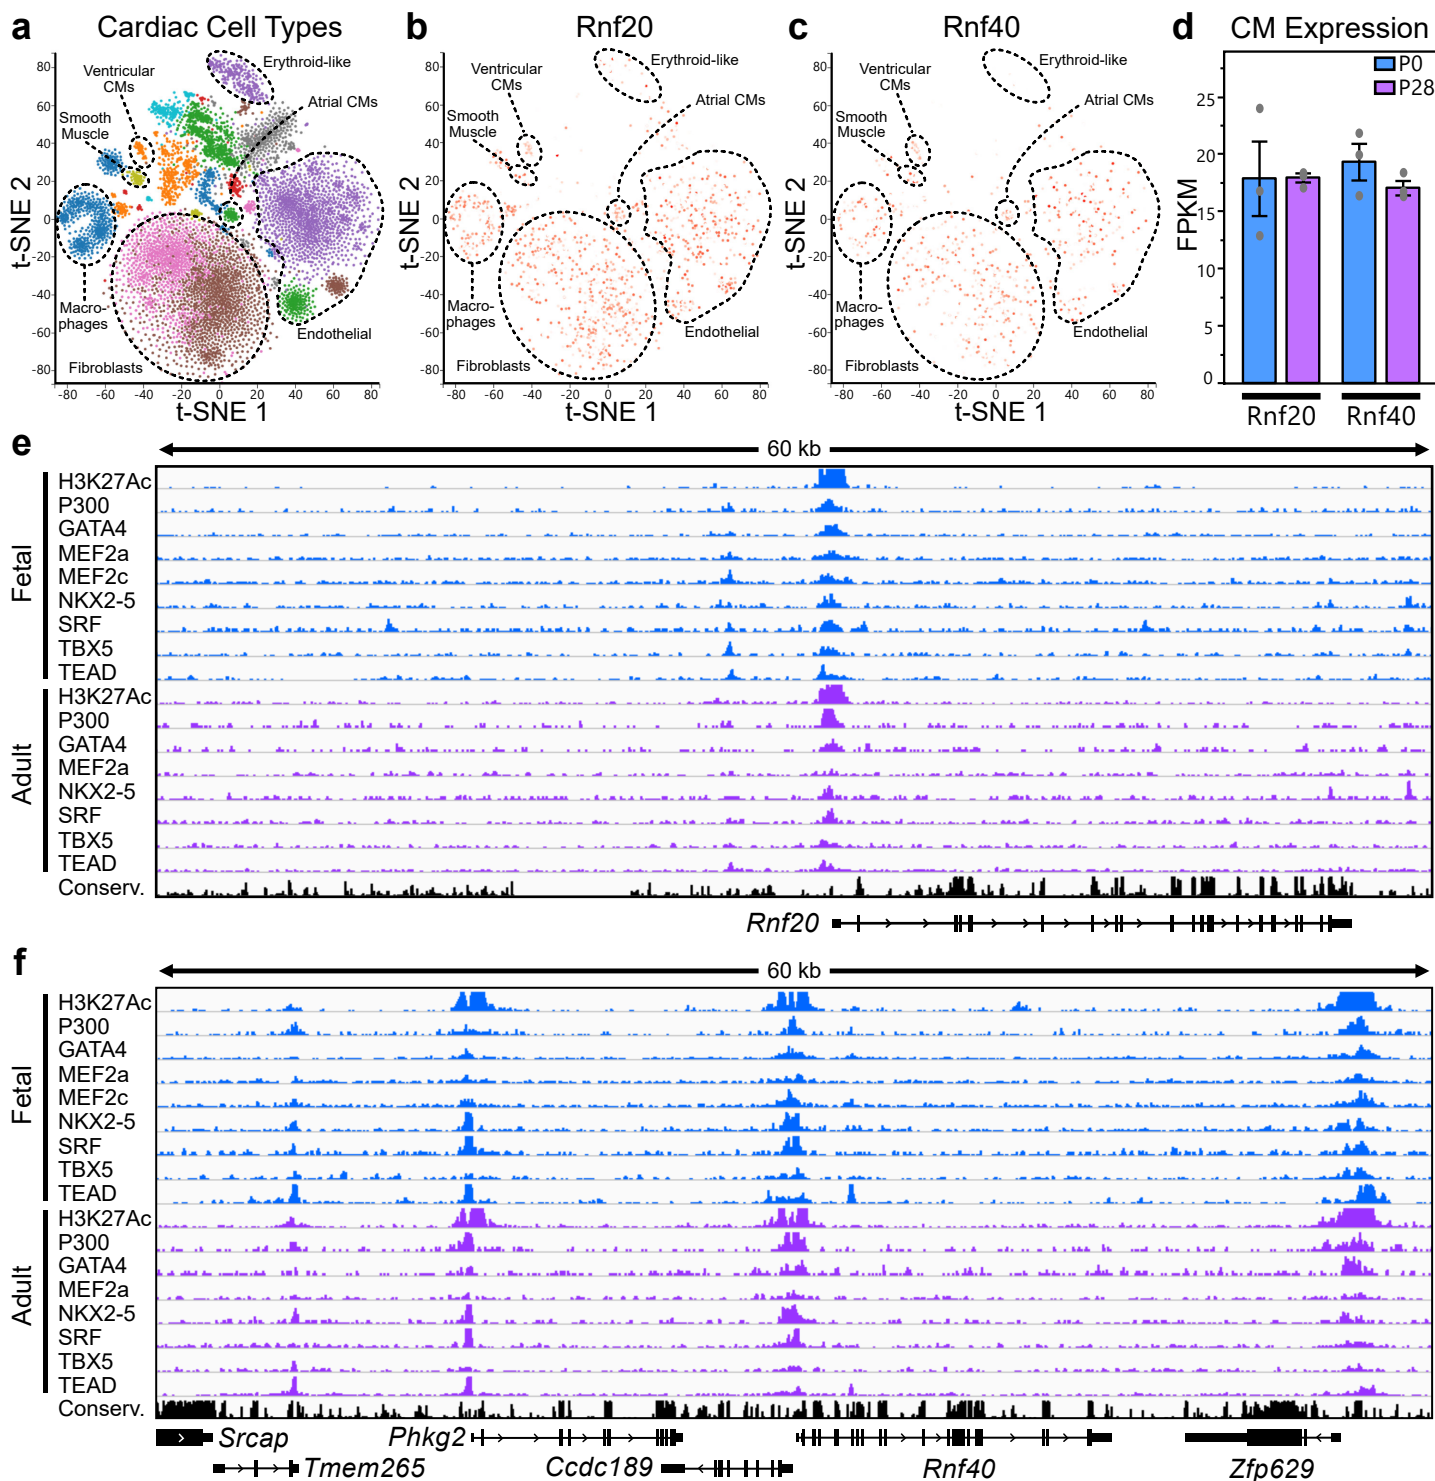

**Suppl. Fig. 4. Cardiac expression profile and regulation of *Rnf20/40*.** **a.** Single cell RNA-sequencing of the adult mouse heart; Panglao database SRA653146. Clustering identified 27 distinct cell populations. **b.** *Rnf20* expression within each population. Dot color intensity corresponds to expression strength. **c.** *Rnf40* expression within each population. **d.** Expression of *Rnf20* and *Rnf40* within newborn and adult ventricular CMs. Data are presented as mean values  $\pm$  SEM. **e.** Chromatin occupancy of enhancer markers and core cardiac transcription factors at the *Rnf20* locus, at fetal and adult stages, within heart whole apex tissue. **f.** Chromatin occupancy at the *Rnf40* locus. Source data are provided as a Source Data file.

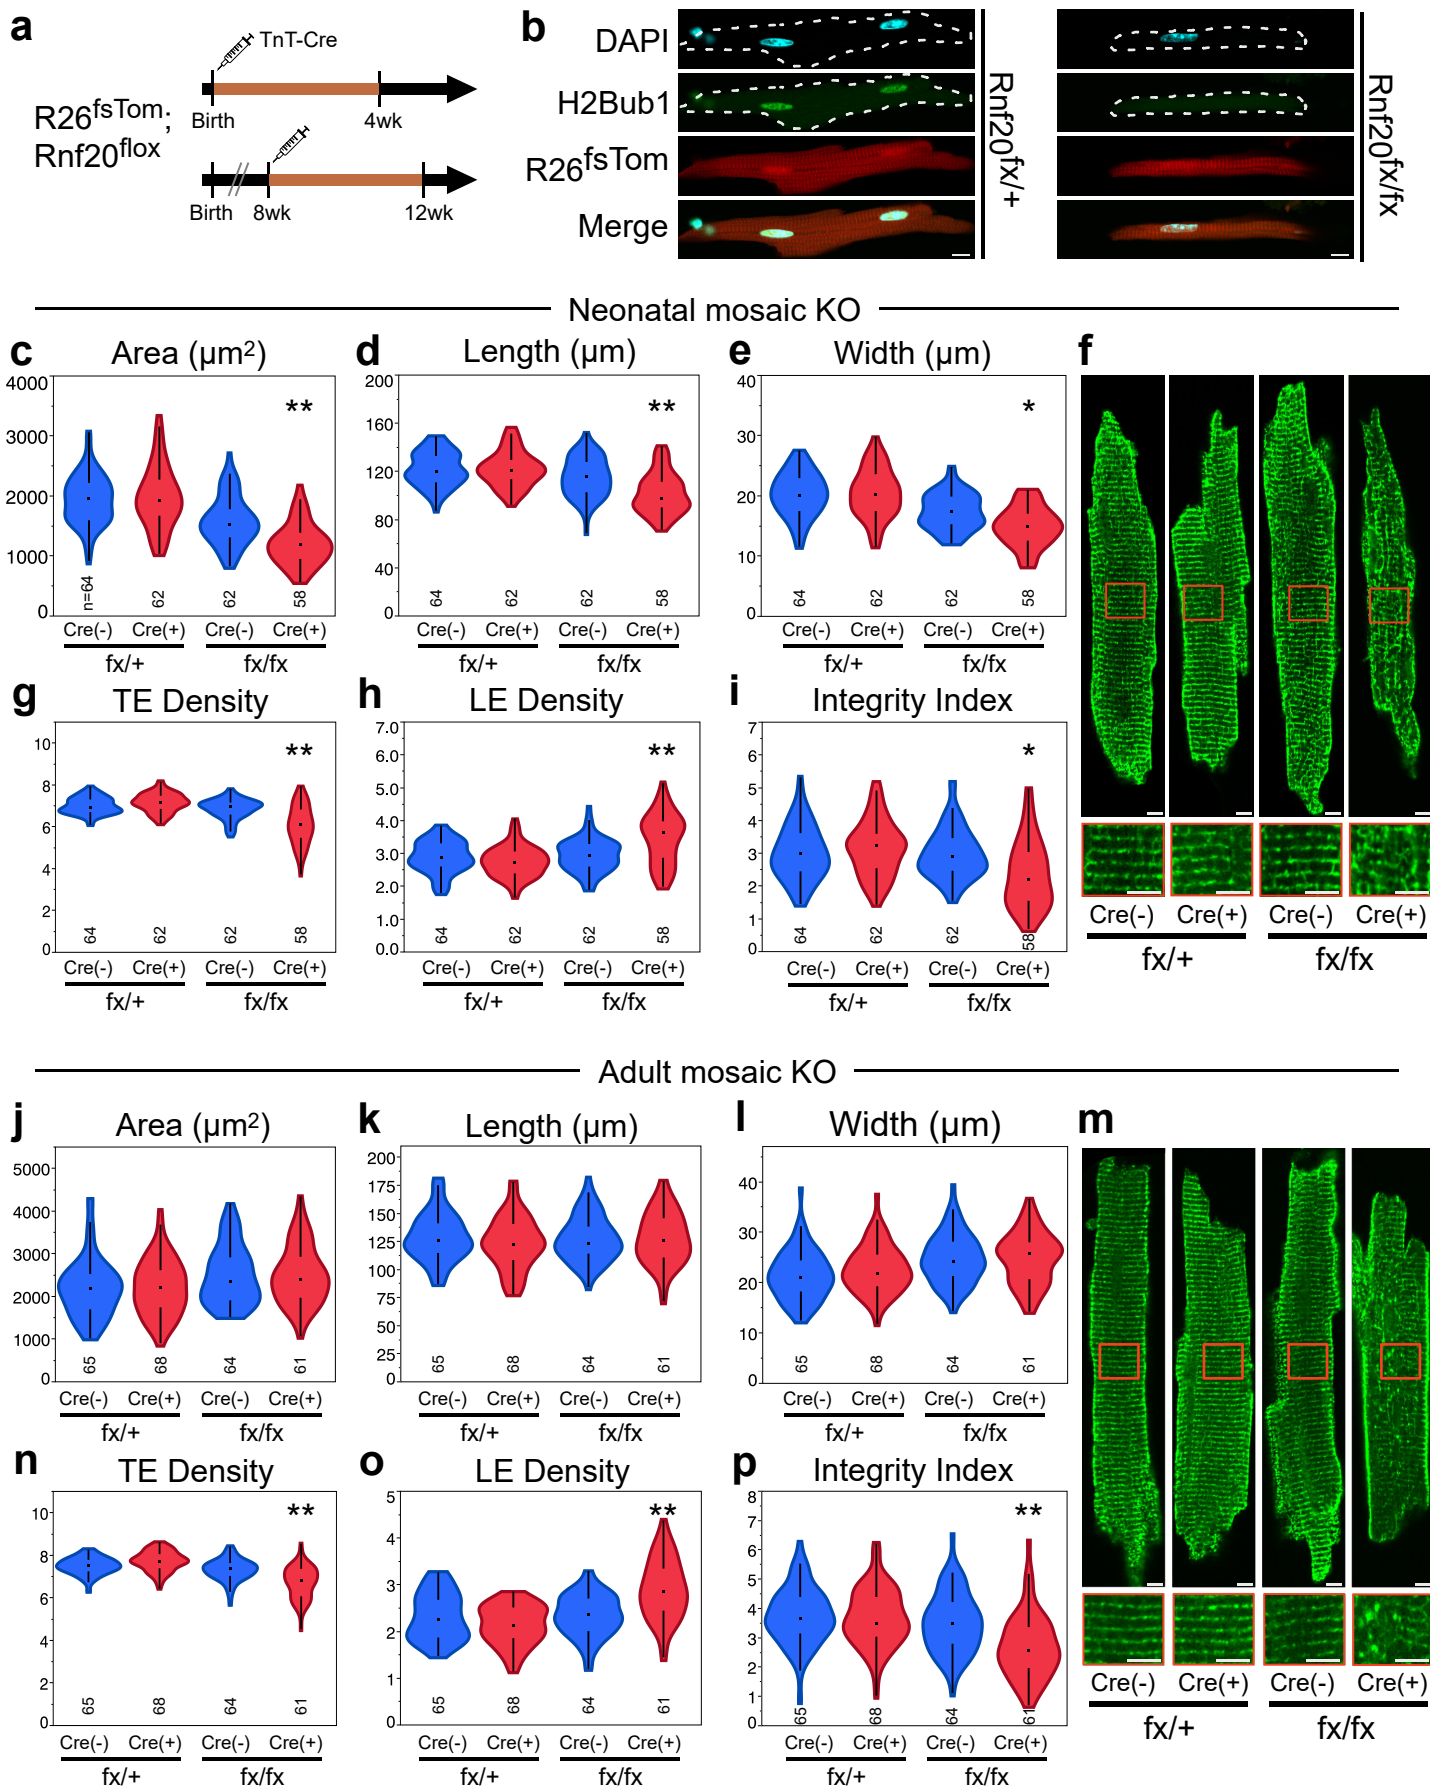

**Suppl. Fig. 5. Mosaic inactivation of *Rnf20* at neonatal and adult stages using AAV-Cre and an *Rnf20* floxed allele. a.** AAV9-TnT-Cre was delivered to neonatal or adult *Rnf20*<sup>lox</sup> mice carrying a tdTomato Cre reporter allele (*R26*<sup>fsTom</sup>), and CMs were dissociated and analyzed at 1 mo or 3 mo of age, respectively. (continued)

**Suppl. Fig. 5, continued.** Panels c-i show neonatal knockout; panels j-p show adult knockout. **b.** Immunostaining confirmed efficient depletion of H2Bub1 in Cre(+); Rnf20<sup>fx/fx</sup> CM nuclei (n=3 mice). Scale bars = 10  $\mu$ m. **c-e.** Morphometric measurement of CMs dissociated at 4 weeks of age. Area and length  $P<0.0001$ ; width  $P=0.0003$ . **f.** CAV3 immunostaining of CMs dissociated at 4 weeks of age. Scale bars = 5  $\mu$ m. **g-i.** Quantification of T-tubule transverse element density ( $P<0.0001$ ), longitudinal element density ( $P<0.0001$ ), and integrity index ( $P=0.0003$ ), respectively. **j-l.** Morphometric measurement of 12-week dissociated CMs. **m.** CAV3 immunostaining of 12-week dissociated CMs. Scale bars = 5  $\mu$ m. **n-p.** Quantification of T-tubule transverse element density, longitudinal element density, and integrity index, respectively ( $P<0.0001$  for all). Dunnett's two-tailed t-test vs. Cre(-); Rnf20<sup>fx/fx</sup>. \* $P<0.05$ , \*\* $P<0.001$ . Violin plots: shape indicates data distribution; point, median; whiskers, starts at quartile and extends 1.5 times the interquartile distance. Source data are provided as a Source Data file. For panels c-p n=3 mice each genotype; ~60 CMs each group, as indicated below distributions in each plot.



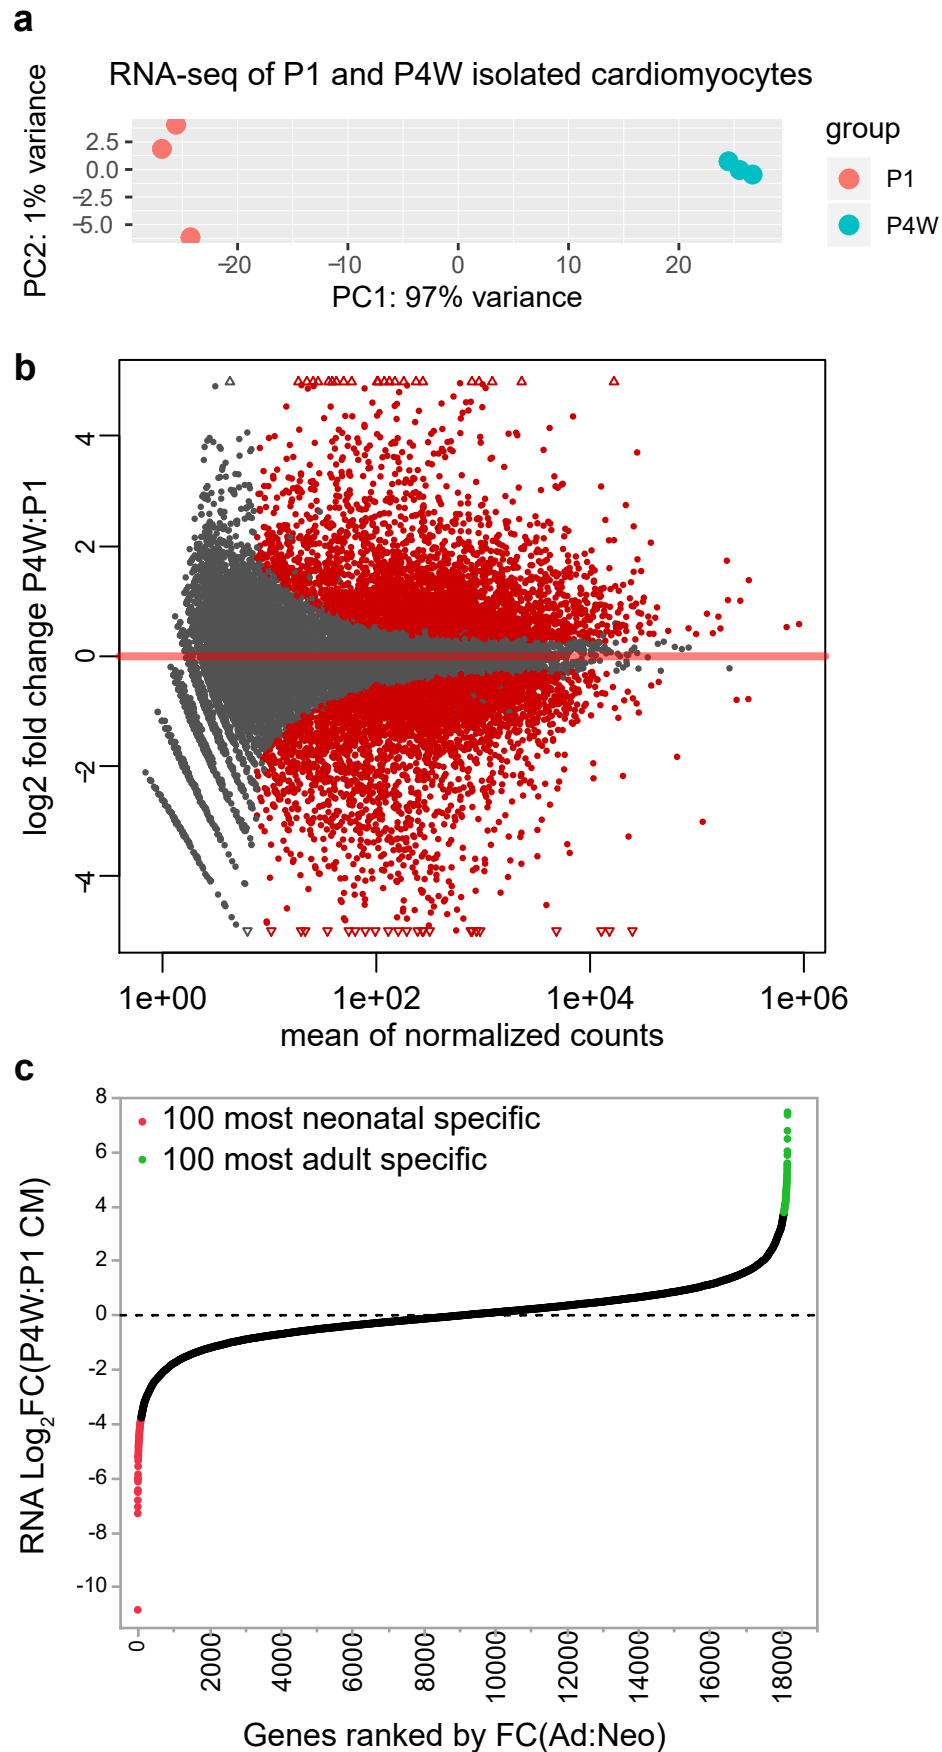

**Suppl. Fig. 6. RNA-seq data from neonatal and 4-week-old cardiomyocytes.** **a.** PCA plot showing separation of biological triplicate samples by age. **b.** MA plot of differential gene expression analysis. Red,  $P_{Adj} < 0.05$ . **c.** P4W:P1 ratio highlighting the 100 most neonatal or adult specific genes. Source data are provided as a Source Data file.

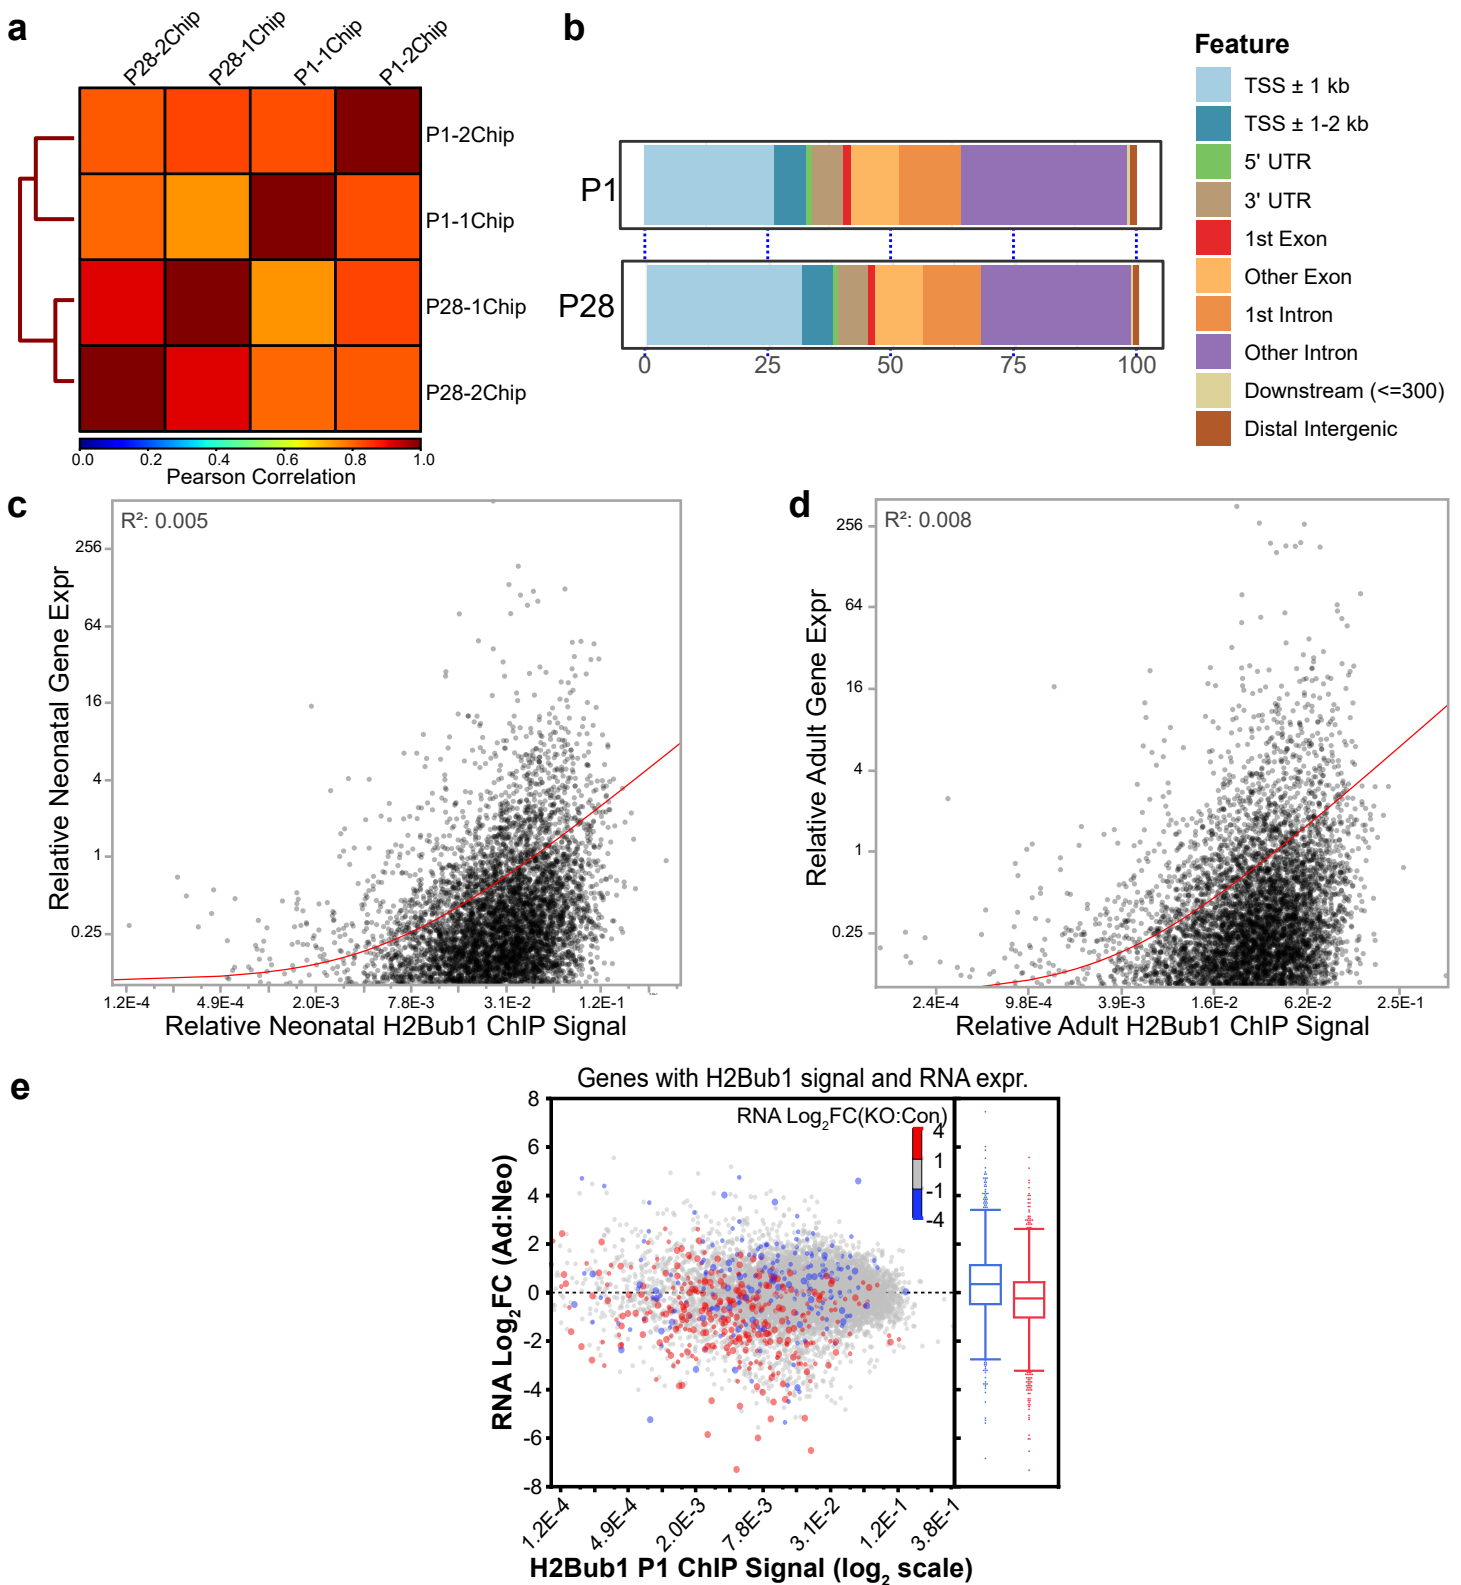

**Suppl. Fig. 7. H2Bub1 ChIP-seq.** **a.** Correlation between biological duplicate H2Bub1 ChIP-seq samples prepared from P1 (neonatal) or P28 (adult) heart apices. Hierarchical clustering by Pearson correlation. **b.** Location of H2Bub1 broad peaks, called by MACS2, with respect to genome annotations. The vast majority of reads fell within gene bodies. **c-d.** Relationship between gene expression and H2Bub1 ChIP signal in neonatal or adult stages. ChIP signal was the input subtracted ChIP, normalized for library depth, composition, and gene length. More active genes tended to have higher H2Bub1 signal, but the correlation was poor. **e.** Maturation change in RNA expression versus H2Bub1 P1 ChIP signal. ChIP signal was input subtracted and normalized for sequencing depth, library composition, and gene length. Points are colored by the change in RNA expression in RNF20/40-depleted CMs versus control CMs. Genes upregulated in RNF20/40 depletion (red) generally were downregulated during maturation and had moderate H2Bub1 occupancy. Center lines in box plots indicate the median, while boxes show 25th and 75th percentiles. Whiskers denote the maximum observation within the 75th percentile + 1.5 times the interquartile range, or the minimum observation within the 25th percentile - 1.5 times the interquartile range. For genes with  $\text{Log}_2\text{FC}(\text{KO}:\text{Con})$  from -1 to -4 (blue box-plot)  $n=1053$ ; from 1 to 4 (red)  $n=2128$ . (continued)

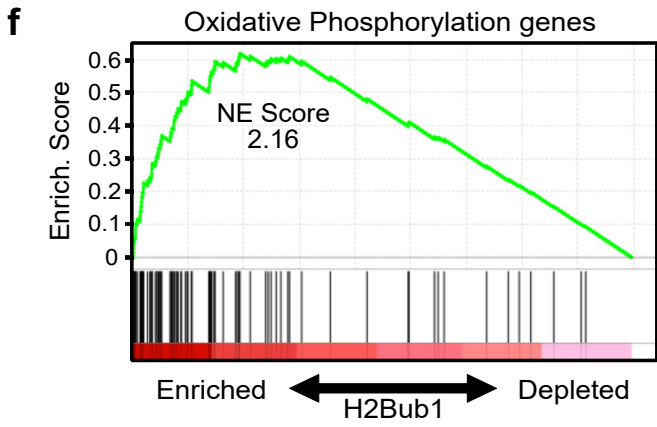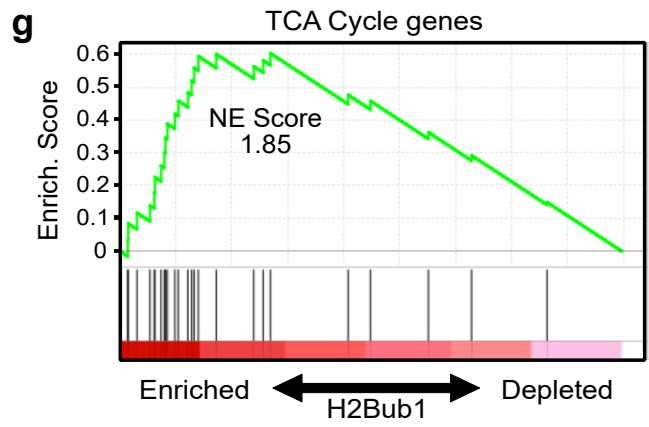

**Suppl. Fig. 7. continued. f-g.** Gene set enrichment analysis of genes ranked by P1 H2Bub1 signal shows that oxidative phosphorylation and TCA cycle genes were preferentially marked. Source data are provided as a Source Data file.

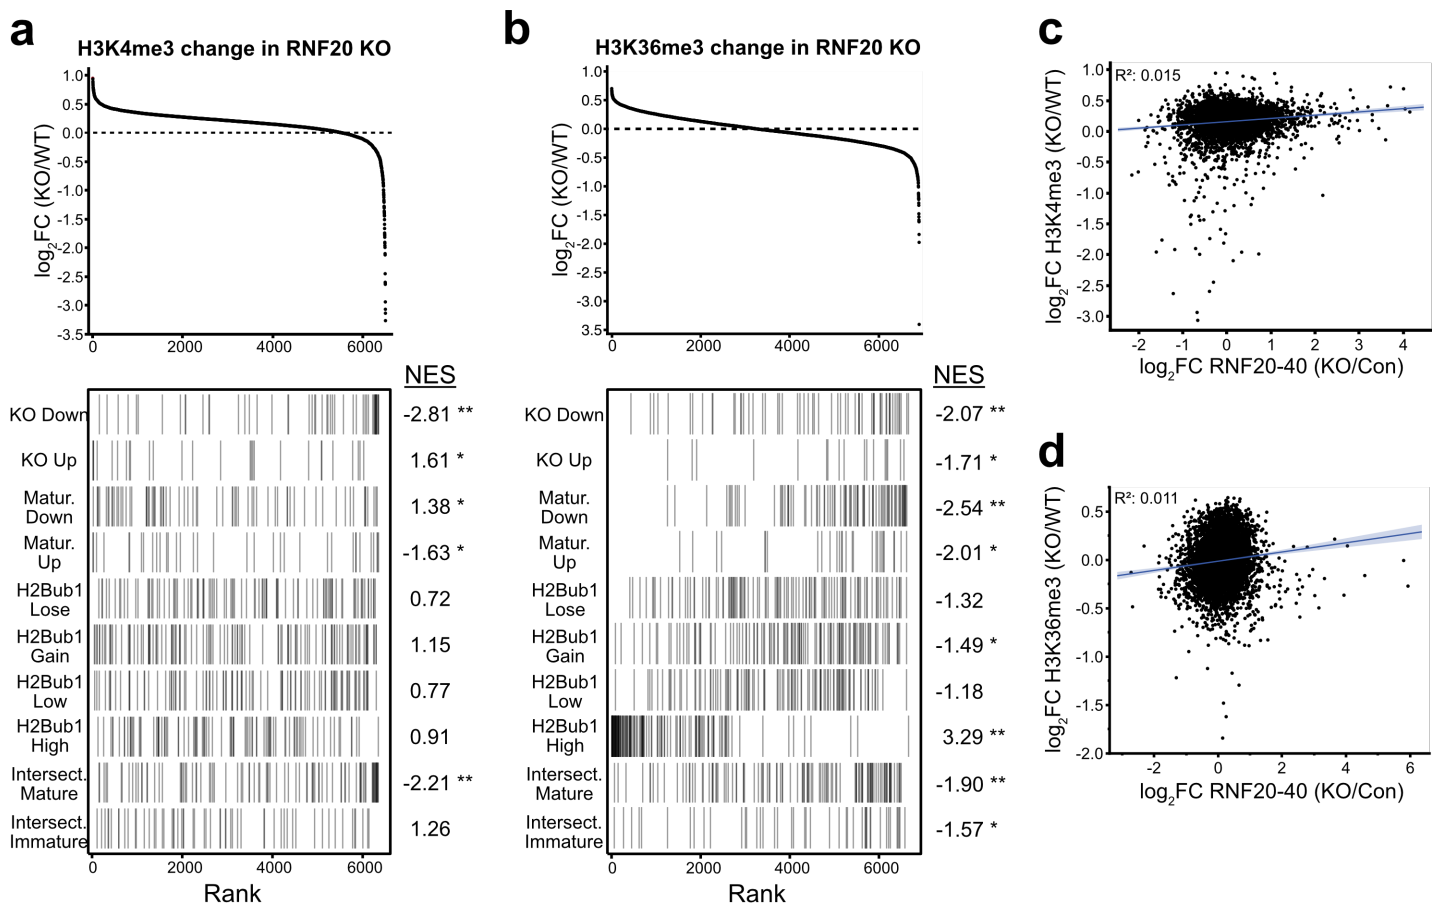

**Suppl. Fig. 8. Gene set enrichment analysis of changes in H3K4me3 or H3K36me3 signal upon *Rnf20* KO.** Wildtype or *Rnf20<sup>fx/fx</sup>* newborn pups were injected with a high dose of AAV9-TnT-Cre. Heart apices were collected at P7 and ChIP-seq conducted for H3K4me3 and H3K36me3. ChIP signal was quantified, marked genes were ranked by change in ChIP signal, and the relationship between ChIP signal and various gene sets of interest was examined by GSEA. Gene sets comprised of 200 genes were defined by: the genes most downregulated or upregulated in the *Rnf20/40* mosaic KO ("KO Down" and "KO Up", respectively); the genes displaying the largest loss or gain in H2Bub1 during maturation ("Matur. Down" and "Matur. Up", respectively); the genes that had the lowest or highest absolute levels of H2Bub1 at P1 ("H2Bub1 Low" and "H2Bub1 High", respectively). Gene sets consisting of the previously identified *Rnf20/40*-regulated maturation genes were also included (see Fig. 4g,h). The gene set "Intersect. Mature" contained the genes that are upregulated during maturation, gain H2Bub1 during maturation, and are downregulated in the *Rnf20/40* KO. The set "Intersect. Immature" contains genes that are downregulated during maturation, lose H2Bub1 during maturation, and are upregulated in *Rnf20/40* KO. **a-b.** H3K4me3 signal at each TSS or H3K36me3 signal over each gene body was quantified in the wild type and *Rnf20* KO condition, and genes were ranked by change in signal (upper panel). For each gene set the distribution of marked genes within the ranked list was analyzed by GSEA (lower panel). NES = normalized enrichment score. \* $P < 0.05$ , \*\* $P < 0.001$ . **c.** Scatterplot showing relationship between change in H3K4me3 in the RNF20 KO and change in gene expression in the RNF20/40 KO. **d.** Scatterplot showing relationship between change in H3K36me3 in the RNF20 KO and change in gene expression in the RNF20/40 KO. Best fit line with shading of 95% confidence interval is shown. Source data are provided as a Source Data file.

| Gene      | Geneset           | FPKM: P0_CM_1 | P0_CM_3  | P0_CM_2  | P4W_CM_1  | P4W_CM_2 | P4W_CM_3  | DESeq2: baseMean | log2FoldCh | lfcSE    | Wald stat | Wald pVal | Corrected pVal | maxFPKM(I) |
|-----------|-------------------|---------------|----------|----------|-----------|----------|-----------|------------------|------------|----------|-----------|-----------|----------------|------------|
| Tnni1     | Neonatal Specific | 574.5256      | 688.3319 | 868.6538 | 0.193776  | 0.52575  | 0.4285389 | 15168.36         | -10.8901   | 0.325465 | -33.46    | 1.84E-245 | 2.63E-241      | 868.6538   |
| Bex4      | Neonatal Specific | 56.07221      | 72.19118 | 98.79191 | 0.228701  | 0.282048 | 0.9195898 | 275.3845         | -7.27916   | 0.632545 | -11.5077  | 1.21E-30  | 4.17E-29       | 197.2064   |
| Cdh3      | Neonatal Specific | 1.022736      | 0.945976 | 1.394254 | 0.023766  | 0.014655 | 0         | 78.89993         | -6.46482   | 0.880905 | -7.33883  | 2.15E-13  | 2.39E-12       | 49.90306   |
| Aldoc     | Neonatal Specific | 1.393525      | 2.064218 | 2.257525 | 0.0597907 | 0        | 0.0291052 | 55.23868         | -5.95673   | 0.897565 | -6.63654  | 3.21E-11  | 2.89E-10       | 14.25238   |
| Hist1h2bp | Neonatal Specific | 0.961166      | 0.35127  | 0.835948 | 0         | 0        | 0.0304709 | 19.81337         | -5.93001   | 1.29754  | -4.57019  | 4.87E-06  | 2.24E-05       | 159.5305   |
| Lars2     | Neonatal Specific | 2904.964      | 580.5579 | 3783.811 | 40.59623  | 41.75453 | 69.681177 | 12748.73         | -5.57922   | 0.755157 | -7.38816  | 1.49E-13  | 1.69E-12       | 13.07093   |
| Hmgcs2    | Neonatal Specific | 291.8549      | 236.6021 | 369.386  | 7.068659  | 8.911243 | 5.7371515 | 4840.888         | -5.37538   | 0.195102 | -27.5517  | 4.23E-167 | 1.01E-163      | 9.99391    |
| Prrx2     | Neonatal Specific | 0.489837      | 0.245175 | 0.487989 | 0         | 0        | 0         | 6.234993         | -5.24691   | 1.462716 | -3.5871   | 3.34E-04  | NA             | 3.71689    |
| Vash2     | Neonatal Specific | 29.14933      | 18.91196 | 30.64982 | 0.54863   | 0.45107  | 1.1030007 | 243.616          | -5.19845   | 0.384076 | -13.535   | 9.72E-42  | 5.43E-40       | 34.89909   |
| Cacng6    | Neonatal Specific | 0.585428      | 0.701805 | 0.907231 | 0.057439  | 0        | 0         | 5.85428          | -5.1741    | 1.128865 | -4.58345  | 4.57E-06  | 2.10E-05       | 26.16978   |
| Tubb2b    | Neonatal Specific | 6.407685      | 4.98089  | 6.548748 | 0.176819  | 0.118944 | 0.1939028 | 315.9848         | -5.17294   | 0.328326 | -15.7555  | 6.30E-56  | 6.38E-54       | 1.741781   |
| Egr2      | Neonatal Specific | 4.581604      | 4.811977 | 5.736582 | 0.066323  | 0.163588 | 0.200108  | 129.3375         | -5.15254   | 0.476083 | -10.2228  | 2.69E-27  | 7.76E-26       | 997.7668   |
| Ccnb1     | Neonatal Specific | 159.6051      | 117.3375 | 235.6231 | 0.275711  | 3.71791  | 5.3033163 | 192.6916         | -5.14825   | 0.427716 | -12.0366  | 2.82E-33  | 8.89E-32       | 21.2162    |
| Fosb      | Neonatal Specific | 30.36986      | 29.22128 | 40.59346 | 0.901131  | 0.977972 | 1.123249  | 789.0876         | -5.05984   | 0.237937 | -21.2654  | 2.37E-100 | 8.70E-98       | 4.541346   |
| Cks2      | Neonatal Specific | 4.161265      | 2.794233 | 5.254468 | 0.204141  | 0.08392  | 0.1368063 | 51.18094         | -4.81043   | 0.686645 | -7.0057   | 2.46E-12  | 2.47E-11       | 4.828389   |
| Capn6     | Neonatal Specific | 50.68146      | 63.80187 | 66.73182 | 2.054259  | 2.895364 | 2.3600093 | 177.0759         | -4.65025   | 0.367716 | -12.6463  | 1.17E-36  | 5.24E-35       | 20.8604    |
| Dlga5     | Neonatal Specific | 14.93059      | 17.07846 | 19.7281  | 0.415906  | 0.820676 | 0.919782  | 178.5908         | -4.59913   | 0.364006 | -12.6438  | 1.17E-36  | 6.05E-35       | 1.784512   |
| Cdk1      | Neonatal Specific | 19.33968      | 30.00602 | 25.36203 | 1.179907  | 0.842448 | 1.1236561 | 345.5678         | -4.55922   | 0.289259 | -15.7617  | 5.71E-56  | 5.83E-54       | 1.868691   |
| Hmnr      | Neonatal Specific | 46.37276      | 54.63545 | 57.32066 | 3.284377  | 1.175952 | 2.560484  | 430.1785         | -4.46526   | 0.259162 | -17.2296  | 1.59E-66  | 2.21E-64       | 25.76382   |
| Igf2bp3   | Neonatal Specific | 37.72012      | 41.7614  | 45.85958 | 1.868776  | 1.491272 | 2.3205671 | 328.5362         | -4.45035   | 0.272373 | -16.3392  | 5.19E-60  | 5.99E-58       | 5.278893   |
| Zfp618    | Neonatal Specific | 17.79526      | 20.585   | 20.81189 | 1.300455  | 0        | 1.30726   | 78.5944          | -4.4291    | 0.501111 | -8.83857  | 9.69E-19  | 1.69E-17       | 45.10958   |
| Socs3     | Neonatal Specific | 99.37674      | 74.74804 | 114.6913 | 4.692681  | 5.125906 | 4.0433447 | 622.2661         | -4.38669   | 0.236026 | -18.5856  | 4.20E-77  | 8.46E-75       | 3.746291   |
| Marcks1   | Neonatal Specific | 9.823917      | 12.457   | 10.21291 | 0.662578  | 0.514491 | 0.3946932 | 382.6407         | -4.36937   | 0.259543 | -16.8348  | 1.36E-63  | 1.76E-61       | 2.280366   |
| Ly6g6d    | Neonatal Specific | 0.324275      | 0.370989 | 0.287157 | 0         | 0        | 0         | 3.30996          | -4.34066   | 1.650677 | -7.62962  | 8.55E-03  | NA             | 4.966301   |
| Sncx      | Neonatal Specific | 3.598248      | 10.28625 | 4.92607  | 0.438259  | 0.360326 | 0.1468508 | 74.55341         | -4.33079   | 0.559898 | -7.73496  | 1.03E-14  | 1.30E-13       | 14.59936   |
| Plagl1    | Neonatal Specific | 2348.254      | 2392.896 | 2711.568 | 97.99998  | 157.484  | 123.88728 | 1459.311         | -4.30694   | 0.181185 | -23.771   | 6.67E-125 | 4.33E-122      | 21.94428   |
| Birc5     | Neonatal Specific | 41.23591      | 51.92663 | 57.95268 | 2.275797  | 2.606182 | 2.7779276 | 269.2311         | -4.3069    | 0.293078 | -14.6954  | 6.06E-49  | 5.48E-47       | 5381.049   |
| Fbn2      | Neonatal Specific | 34.43668      | 38.58827 | 38.94973 | 1.916118  | 2.363078 | 1.579438  | 849.4897         | -4.27227   | 0.1949   | -19.2023  | 1.66E-106 | 7.67E-104      | 23.20323   |
| Cenpm     | Neonatal Specific | 1.384659      | 2.427963 | 2.293652 | 0.143847  | 0.141921 | 0.05784   | 61.79711         | -4.1776    | 0.54271  | -7.69768  | 1.39E-14  | 1.72E-13       | 2.444613   |
| Nts       | Neonatal Specific | 13.90397      | 14.22191 | 14.25238 | 0.473737  | 0.973738 | 1.0318017 | 156.602          | -4.10988   | 0.34025  | -12.079   | 1.36E-33  | 5.37E-32       | 16.01097   |
| Anln      | Neonatal Specific | 66.77463      | 76.48954 | 85.15896 | 4.052051  | 4.626209 | 4.6350814 | 476.9369         | -4.10255   | 0.226507 | -18.1123  | 2.55E-73  | 4.50E-71       | 2.026302   |
| Nek2      | Neonatal Specific | 4.180718      | 4.106266 | 5.213794 | 0.43432   | 0.252062 | 0.1027277 | 154.1758         | -4.094     | 0.357881 | -11.4395  | 2.65E-30  | 9.00E-29       | 1.53587    |
| Kif4      | Neonatal Specific | 16.63041      | 16.46674 | 21.35828 | 1.350867  | 0.913599 | 0.9636963 | 364.8796         | -4.06771   | 0.252997 | -16.0781  | 3.64E-58  | 3.94E-56       | 13.00353   |
| Bmp7      | Neonatal Specific | 18.60845      | 17.04049 | 26.15755 | 0.957198  | 1.652669 | 1.1546485 | 283.2365         | -4.05858   | 0.289622 | -14.0134  | 1.29E-44  | 8.21E-43       | 188.2504   |
| Igf2bp1   | Neonatal Specific | 8.938505      | 7.705128 | 9.275824 | 0.822189  | 0.101398 | 0.5785436 | 91.93255         | -4.04834   | 0.432002 | -9.37111  | 7.18E-21  | 1.43E-19       | 72.03134   |
| Fam83d    | Neonatal Specific | 1.896775      | 1.841837 | 2.352861 | 0.026586  | 0.13115  | 2.1318009 | 67.00851         | -4.0432    | 0.500559 | -8.07737  | 6.62E-16  | 9.14E-15       | 74.85996   |
| Cited1    | Neonatal Specific | 22.0505       | 27.90368 | 37.87931 | 1.915216  | 2.099526 | 1.3904493 | 241.5456         | -4.03611   | 0.308951 | -13.0639  | 5.29E-39  | 2.64E-37       | 16.74431   |
| Ccdc113   | Neonatal Specific | 3.298674      | 4.600414 | 3.370495 | 0         | 0.414497 | 0.3378561 | 29.57868         | -3.96257   | 0.719462 | -5.50769  | 3.64E-08  | 2.28E-07       | 641.7685   |
| Ckap2l    | Neonatal Specific | 22.61607      | 35.41378 | 30.67845 | 1.886357  | 1.314908 | 2.555785  | 317.4861         | -3.93068   | 0.27523  | -14.2815  | 2.86E-46  | 2.01E-44       | 8.400467   |
| Tgfr1     | Neonatal Specific | 2.02085       | 1.798198 | 2.705608 | 0.127463  | 0.157195 | 0.1494849 | 90.29212         | -3.91812   | 0.426886 | -9.17837  | 4.38E-20  | 8.26E-19       | 2.912205   |
| Hey2      | Neonatal Specific | 32.73412      | 30.04977 | 39.472   | 1.261171  | 2.41987  | 2.2079495 | 1026.399         | -3.91492   | 0.183941 | -21.2836  | 1.61E-100 | 6.06E-98       | 21.71935   |
| Pdk3      | Neonatal Specific | 11.6621       | 8.855292 | 12.6571  | 0.216718  | 0.826152 | 0.7835878 | 801.2659         | -3.89908   | 0.205871 | -18.9394  | 5.40E-80  | 1.21E-77       | 7.170078   |
| Bub1b     | Neonatal Specific | 18.16116      | 22.28248 | 19.83922 | 1.030486  | 1.429719 | 1.6833018 | 413.6005         | -3.86668   | 0.231545 | -16.6995  | 1.32E-62  | 1.64E-60       | 110.9342   |
| Col18a1   | Neonatal Specific | 14.06918      | 11.0996  | 14.66386 | 0.755859  | 0.932174 | 1.0499254 | 853.8463         | -3.86346   | 0.196623 | -19.6491  | 5.89E-86  | 1.50E-83       | 1.364212   |
| Acot1     | Neonatal Specific | 56.15077      | 57.34966 | 73.7225  | 5.417175  | 4.165679 | 3.313776  | 865.6095         | -3.85681   | 0.204037 | -18.9025  | 1.09E-79  | 2.39E-77       | 15.93867   |
| Racgap1   | Neonatal Specific | 14.94402      | 14.6575  | 17.45487 | 0.856889  | 1.607994 | 0.8613729 | 324.3344         | -3.83895   | 0.255177 | -15.0443  | 3.76E-51  | 3.36E-49       | 6.939709   |
| Mdk       | Neonatal Specific | 2.87038       | 5.134861 | 4.765922 | 0.316831  | 0.393736 | 0.2123257 | 35.7338          | -3.82634   | 0.641608 | -5.96367  | 2.47E-09  | 1.80E-08       | 2.678346   |
| Ndc80     | Neonatal Specific | 16.42744      | 25.70023 | 22.05869 | 1.79347   | 0.904857 | 1.6968041 | 179.5438         | -3.80842   | 0.321567 | -11.8433  | 2.33E-32  | 8.70E-31       | 144.7973   |
| Cdc25b    | Neonatal Specific | 5.585741      | 6.390408 | 6.403791 | 0.308275  | 0.504733 | 0.4426976 | 123.4805         | -3.79581   | 0.354625 | -10.7037  | 9.78E-27  | 2.73E-25       | 20.0072    |
| Hyi       | Neonatal Specific | 0.944531      | 1.219363 | 1.713968 | 0.027346  | 0.033725 | 0.2199129 | 41.92053         | -3.75056   | 0.607806 | -6.17064  | 6.80E-10  | 5.30E-09       | 172.0349   |
| Acs1      | Neonatal Specific | 69.76025      | 127.3964 | 93.53123 | 6.398202  | 7.772014 | 7.9307952 | 1092.228         | -3.71925   | 0.206869 | -17.9787  | 2.86E-72  | 4.76E-70       | 42.45743   |
| Mest      | Neonatal Specific | 24.67335      | 22.02434 | 33.40144 | 1.860603  | 2.3796   | 1.9396105 | 1735.343         | -3.70202   | 0.200097 | -18.5011  | 2.02E-76  | 4.02E-74       | 28.57188   |
| Aurka     | Neonatal Specific | 8.95576       | 5.882468 | 11.0161  | 0.701916  | 0.461678 | 0.7996668 | 163.8604         | -3.70064   | 0.343731 | -10.7661  | 4.98E-27  | 1.42E-25       | 36.81408   |
| Mdfi      | Neonatal Specific | 1.737085      | 2.392151 | 1.922815 | 0.073043  | 0.180163 | 0.2202762 | 24.62547         | -3.69314   | 0.732142 | -5.0443   | 5.45E-07  | 2.46E-06       | 11.97904   |
| Tcf19     | Neonatal Specific | 9.192699      | 7.933858 | 9.884855 | 0.366202  | 1.053788 | 0.736236  | 65.86432         | -3.68195   | 0.462165 | -7.96675  | 1.63E-15  | 2.18E-14       | 146.3455   |
| Mmp14     | Neonatal Specific | 14.57111      | 47.91746 | 21.08452 | 1.58679   | 2.979798 | 1.0121042 | 360.1784         | -3.67311   | 0.596284 | -6.16     | 4.72E-10  | 5.65E-09       | 8.11263    |
| Ckap2     | Neonatal Specific | 22.93189      | 26.9007  | 32.22902 | 2.310772  | 2.399825 | 1.8338397 | 200.8205         | -3.65807   | 0.291621 | -12.5439  | 4.29E-36  | 1.88E-34       | 1.186933   |
| Nuf2      | Neonatal Specific | 2.762427      | 4.139599 | 3.45726  | 0.231764  | 0.414448 | 0.1980305 | 266.4934         | -3.64699   | 0.280298 | -13.0111  | 1.06E-38  | 5.09E-37       | 92.4682    |
| Klc3      | Neonatal Specific | 0.065236      | 0.048374 | 0.028884 | 0         | 0        | 0         | 2.054508         | -3.63227   | 1.89227  | -9.1953   | 5.49E-02  | NA             | 0.989701   |
| Dusp2     | Neonatal Specific | 1.102317      | 1.219795 | 0.938597 | 0.149751  | 0.061561 | 0.0501783 | 19.44969         | -3.61614   | 0.806238 | -4.4852   | 7.28E-06  | 3.24E-05       | 1.585982   |
| Zfp18     |                   |               |          |          |           |          |           |                  |            |          |           |           |                |            |

|          |                   |          |          |          |          |          |           |           |          |          |          |           |             |          |
|----------|-------------------|----------|----------|----------|----------|----------|-----------|-----------|----------|----------|----------|-----------|-------------|----------|
| Sox4     | Neonatal Specific | 16.22647 | 78.89013 | 27.51235 | 4.00073  | 4.641573 | 5.0941085 | 1268.372  | -3.15845 | 0.688275 | -4.58893 | 4.46E-06  | 2.06E-05    | 17.92682 |
| Nipal4   | Neonatal Specific | 3.80221  | 3.955848 | 3.910894 | 0.516536 | 0.127405 | 0.6230866 | 34.51572  | -3.15541 | 0.561086 | -5.62374 | 1.87E-08  | 1.22E-07    | 16.44693 |
| Prim1    | Neonatal Specific | 2.325963 | 2.466552 | 3.219569 | 0.279172 | 0.270515 | 0.3608132 | 123.3376  | -3.13424 | 0.324014 | -9.67316 | 3.92E-22  | 8.51E-21    | 17.28702 |
| Spag5    | Neonatal Specific | 25.5438  | 23.92924 | 31.21024 | 2.513579 | 3.589365 | 3.1916615 | 187.4757  | -3.12866 | 0.273499 | -11.4394 | 2.66E-30  | 9.00E-29    | 40.5637  |
| Gins2    | Neonatal Specific | 3.38353  | 4.787349 | 3.806033 | 0.376836 | 0.464739 | 0.5411547 | 68.40504  | -3.12042 | 0.411554 | -7.58231 | 3.39E-14  | 4.05E-13    | 2.846898 |
| Mastl    | Neonatal Specific | 34.39504 | 27.71549 | 34.08851 | 1.880621 | 4.638602 | 4.7261528 | 157.482   | -3.10957 | 0.30315  | -10.2575 | 1.09E-24  | 2.75E-23    | 2.485129 |
| Irf7     | Adult Specific    | 2.678187 | 3.614384 | 3.24123  | 15.13557 | 24.11044 | 28.210713 | 134.604   | 2.804576 | 0.281824 | 9.951509 | 2.48E-23  | 5.82E-22    | 13.63118 |
| Cyp4b1   | Adult Specific    | 0.38528  | 0.421397 | 0.433583 | 2.721728 | 3.21675  | 2.8499685 | 97.50337  | 2.812768 | 0.275914 | 10.19437 | 1.20E-24  | 5.15E-23    | 2.763423 |
| Srrm4    | Adult Specific    | 0.696376 | 0.318199 | 0.216667 | 2.825329 | 3.033457 | 2.4391559 | 79.02305  | 2.830813 | 0.369363 | 7.664035 | 1.80E-14  | 2.20E-13    | 6.809683 |
| Map2k3   | Adult Specific    | 1.021579 | 0.99795  | 1.371718 | 8.844403 | 8.803378 | 6.6630836 | 389.3759  | 2.83321  | 0.201223 | 14.07997 | 5.04E-45  | 3.29E-43    | 24.52423 |
| Metrn    | Adult Specific    | 0.187596 | 0.27376  | 0.249184 | 1.775805 | 1.944882 | 1.4653781 | 122.6478  | 2.838021 | 0.264926 | 10.7125  | 8.89E-27  | 2.50E-25    | 8.288174 |
| Kcnj8    | Adult Specific    | 60.8377  | 99.24702 | 103.7573 | 553.1357 | 618.3628 | 768.04142 | 152.6234  | 2.843552 | 0.259579 | 10.94688 | 6.88E-28  | 2.05E-26    | 1.562165 |
| Asap3    | Adult Specific    | 0.510162 | 0.610774 | 0.496944 | 3.800507 | 4.485001 | 3.458115  | 224.8278  | 2.851354 | 0.214625 | 13.28527 | 1.82E-40  | 1.49E-38    | 38.8404  |
| Lyz2     | Adult Specific    | 2.108655 | 2.74748  | 2.467491 | 12.76811 | 17.3867  | 24.065469 | 127.5493  | 2.873101 | 0.286562 | 10.02611 | 1.17E-23  | 2.78E-22    | 73.43508 |
| Osgin1   | Adult Specific    | 0.121929 | 0.271238 | 0.026993 | 2.045684 | 0.53113  | 0.5411547 | 9.058096  | 2.883935 | 0.946074 | 3.048318 | 2.30E-03  | 0.006365254 | 48.84921 |
| Mndal    | Adult Specific    | 1.137578 | 2.099466 | 1.193916 | 7.366491 | 11.10368 | 14.884872 | 139.976   | 2.890965 | 0.311002 | 9.296566 | 1.46E-20  | 2.85E-19    | 43.32211 |
| Cd300ld  | Adult Specific    | 0.116027 | 0.019358 | 0.012843 | 0.332982 | 0.252711 | 0.3604726 | 11.77726  | 2.891064 | 0.822414 | 3.515339 | 4.39E-04  | 0.001430755 | 1.256816 |
| Apo110b  | Adult Specific    | 0.436156 | 0.089562 | 0.014855 | 0.948039 | 1.242256 | 1.3699369 | 19.07704  | 2.896072 | 0.743081 | 3.897383 | 9.72E-05  | 0.000359438 | 10095.22 |
| Kcnd3    | Adult Specific    | 4.159477 | 3.38395  | 3.814917 | 28.64911 | 30.54334 | 25.317821 | 251.8118  | 2.905798 | 0.202699 | 14.33552 | 1.31E-46  | 9.53E-45    | 2.89488  |
| Asb14    | Adult Specific    | 5.84305  | 6.288945 | 6.86283  | 55.73622 | 45.18993 | 41.989842 | 722.2592  | 2.906864 | 0.168798 | 17.22098 | 1.85E-66  | 2.54E-64    | 3.036994 |
| Al593442 | Adult Specific    | 0.828954 | 0.352047 | 0.083417 | 2.462166 | 3.528906 | 2.9433025 | 42.24558  | 2.925844 | 0.531447 | 5.505426 | 3.68E-08  | 2.30E-07    | 7.352484 |
| Rsad2    | Adult Specific    | 3.403343 | 9.137326 | 5.599912 | 36.89229 | 52.14369 | 52.294487 | 212.034   | 2.930725 | 0.284531 | 10.30021 | 7.03E-25  | 1.78E-23    | 1.09655  |
| Enho     | Adult Specific    | 0.178075 | 0.396139 | 0.525641 | 2.463534 | 3.619967 | 2.8979434 | 53.01565  | 2.953458 | 0.396058 | 7.457134 | 8.84E-14  | 1.02E-12    | 1.368923 |
| Nlrc5    | Adult Specific    | 1.600668 | 0.794327 | 0.299845 | 6.306142 | 6.302162 | 6.9949128 | 56.53006  | 2.957013 | 0.441028 | 6.70482  | 2.02E-11  | 1.85E-10    | 25.50847 |
| Fcer1g   | Adult Specific    | 0.241973 | 0        | 0.08571  | 0.940149 | 0.421619 | 0.8591529 | 8.219521  | 2.963793 | 0.988077 | 2.999557 | 2.70E-03  | 0.007343815 | 136.5015 |
| Plixdc2  | Adult Specific    | 41.84603 | 44.03818 | 43.82606 | 319.7727 | 304.9748 | 395.73563 | 223.0798  | 2.973474 | 0.212991 | 13.96056 | 7.12E-44  | 1.68E-42    | 3.568843 |
| Tnfai2   | Adult Specific    | 1.076588 | 1.842956 | 1.325622 | 12.00554 | 11.25524 | 10.593946 | 57.92676  | 2.980448 | 0.19518  | 15.27028 | 1.21E-52  | 1.12E-50    | 14.76716 |
| Higd1b   | Adult Specific    | 0.120173 | 0.0802   | 0.133022 | 1.167289 | 0.523482 | 0.9067156 | 15.22617  | 2.985278 | 0.664133 | 4.495002 | 6.96E-06  | 3.11E-05    | 12.7141  |
| Acsm5    | Adult Specific    | 0.436676 | 0.416319 | 0.082863 | 3.084801 | 1.902187 | 2.1042109 | 20.08331  | 2.988357 | 0.627534 | 4.762062 | 1.92E-06  | 9.42E-06    | 831.9986 |
| Kcna7    | Adult Specific    | 0.292706 | 0.332081 | 0.304562 | 2.739774 | 2.645715 | 2.0525919 | 89.2342   | 2.990879 | 0.295188 | 10.1321  | 3.98E-24  | 9.63E-23    | 63.90875 |
| Kcnc3    | Adult Specific    | 0.139183 | 0.039406 | 0.005602 | 0.536306 | 0.413379 | 0.3594084 | 18.41999  | 3.007686 | 0.726707 | 4.13879  | 3.49E-05  | 0.000139677 | 23.25269 |
| Ctl4a    | Adult Specific    | 0.050476 | 0.025666 | 0.003193 | 0.178288 | 0.251287 | 0.1536181 | 14.34028  | 3.01746  | 0.754318 | 4.000248 | 6.33E-05  | 0.000240956 | 31.77359 |
| Uts2r    | Adult Specific    | 0.055335 | 0.098477 | 0.024501 | 0.684808 | 0.482087 | 0.2947114 | 4.623477  | 3.023103 | 1.17389  | 2.575286 | 1.00E-02  | NA          | 63.81415 |
| Slc25a35 | Adult Specific    | 0.659897 | 1.334525 | 0.345305 | 5.82712  | 7.317037 | 6.1771169 | 56.35539  | 3.024856 | 0.426726 | 7.088526 | 1.36E-12  | 1.41E-11    | 22.83925 |
| Lrrc2    | Adult Specific    | 50.42646 | 39.37999 | 53.56967 | 392.5167 | 389.5505 | 387.1278  | 3469.465  | 3.028762 | 0.147137 | 20.58471 | 3.76E-94  | 1.08E-91    | 7.252832 |
| Lptm5    | Adult Specific    | 0.168656 | 0.107196 | 0.064008 | 0.468064 | 0.892108 | 1.2832172 | 19.32526  | 3.039809 | 0.626963 | 4.84847  | 1.24E-06  | 6.29E-06    | 6.254837 |
| P2rx6    | Adult Specific    | 0.447962 | 0.847039 | 0.545444 | 4.944574 | 4.390534 | 6.3621721 | 24.44177  | 3.050561 | 0.52925  | 5.673935 | 8.22E-09  | 5.61E-08    | 10.43576 |
| Crybb1   | Adult Specific    | 0.090347 | 0.060294 | 0.060004 | 0.239338 | 0.491945 | 0.9623614 | 6.579468  | 3.06202  | 1.006321 | 3.042787 | 2.34E-03  | NA          | 8.112003 |
| Tgtp2    | Adult Specific    | 0.043617 | 0.135839 | 0.057936 | 0.423667 | 0.85499  | 0.813052  | 16.6688   | 3.062049 | 0.662775 | 4.62004  | 3.84E-06  | 1.80E-05    | 1.818498 |
| Ilgp1    | Adult Specific    | 5.545865 | 8.731367 | 7.274924 | 60.38565 | 55.56367 | 66.18892  | 2149.675  | 3.073577 | 0.170194 | 18.05927 | 6.67E-73  | 1.15E-70    | 1.226725 |
| Sncg     | Adult Specific    | 0.039283 | 0.367022 | 0.052179 | 1.526267 | 1.368938 | 1.2552978 | 18.31243  | 3.077809 | 0.702714 | 4.37989  | 1.19E-05  | 5.14E-05    | 18.79818 |
| Atp1a2   | Adult Specific    | 48.0513  | 83.76547 | 65.92754 | 590.0905 | 587.4175 | 512.90958 | 12676.82  | 3.094559 | 0.178972 | 17.20977 | 5.52E-67  | 7.74E-65    | 1.108349 |
| Cyp2b10  | Adult Specific    | 0.258104 | 0.143542 | 0.057114 | 1.595404 | 0.843327 | 1.1455372 | 9.779249  | 3.100658 | 0.837915 | 3.700447 | 2.15E-04  | 0.000746174 | 39.33008 |
| Slc1a7   | Adult Specific    | 0.115813 | 0.020611 | 0.020511 | 0.449973 | 0.554935 | 0.1644826 | 8.937264  | 3.103116 | 0.931799 | 3.330241 | 8.68E-04  | 0.00264491  | 3.297902 |
| Slamf9   | Adult Specific    | 0.063484 | 0.01883  | 0.018739 | 0.224233 | 0.138269 | 0.4132454 | 6.466961  | 3.119683 | 1.027758 | 3.035427 | 2.40E-03  | NA          | 23.19079 |
| Kctd21   | Adult Specific    | 0.205663 | 0.146403 | 0.036424 | 1.089648 | 1.164467 | 0.9493027 | 27.26028  | 3.137284 | 0.553305 | 5.670085 | 1.43E-08  | 9.37E-08    | 7.518506 |
| Mlybph   | Adult Specific    | 0.303037 | 0.29961  | 0.313075 | 2.19132  | 4.6935   | 1.1357456 | 42.01574  | 3.141189 | 0.493457 | 6.365685 | 1.94E-10  | 1.60E-09    | 76.41033 |
| Limch1   | Adult Specific    | 17.5186  | 31.71013 | 22.91626 | 224.37   | 217.3198 | 196.81912 | 5552.628  | 3.143321 | 0.18507  | 16.98448 | 1.07E-64  | 1.40E-62    | 11.79092 |
| Il18bp   | Adult Specific    | 0.24308  | 0.188085 | 0.219936 | 1.735852 | 1.956611 | 1.9888502 | 93.51643  | 3.144254 | 0.28908  | 10.87674 | 1.49E-27  | 4.35E-26    | 19.55476 |
| Igfbp6   | Adult Specific    | 0.10601  | 0.082539 | 0.041071 | 0.280832 | 0.808127 | 0.8704304 | 25.78281  | 3.148767 | 0.578322 | 5.444664 | 5.19E-08  | 3.16E-07    | 67.15226 |
| Pcolce2  | Adult Specific    | 1.702932 | 2.312837 | 1.964379 | 17.33268 | 13.98785 | 20.207931 | 208.6836  | 3.155232 | 0.222259 | 14.1962  | 9.67E-46  | 6.65E-44    | 2.496332 |
| Slco3a1  | Adult Specific    | 0.409545 | 4.593283 | 5.003865 | 43.23696 | 42.40295 | 39.01456  | 859.1244  | 3.177574 | 0.153894 | 20.6478  | 1.02E-94  | 2.98E-92    | 161.6942 |
| Oas2     | Adult Specific    | 7.242583 | 5.012476 | 1.068928 | 31.26666 | 36.80731 | 44.288103 | 24.347679 | 3.179495 | 0.58917  | 5.396563 | 6.79E-08  | 4.09E-07    | 11.8873  |
| Ankr35   | Adult Specific    | 0.182624 | 0.073865 | 0.036755 | 0.733015 | 0.687041 | 1.0021171 | 25.5277   | 3.195339 | 0.571968 | 5.586568 | 2.32E-08  | 1.49E-07    | 83.33783 |
| Klhl34   | Adult Specific    | 0.008777 | 0.044908 | 0.05635  | 0.426275 | 0.382334 | 0.2960583 | 43.20071  | 3.215856 | 0.454938 | 7.068778 | 1.56E-12  | 1.61E-11    | 27.51027 |
| Smoc2    | Adult Specific    | 0.725183 | 1.405798 | 0.860057 | 8.507668 | 10.88707 | 9.1499187 | 190.0435  | 3.221579 | 0.25835  | 12.46981 | 1.09E-35  | 4.67E-34    | 5.251947 |
| Prss55   | Adult Specific    | 1.014977 | 0.045157 | 0        | 3.943453 | 2.652779 | 2.8830384 | 16.20706  | 3.239189 | 1.613009 | 2.008166 | 4.46E-02  | 0.086049676 | 20.20485 |
| Eph3     | Adult Specific    | 0.136867 | 0.03044  | 0.010098 | 0.563882 | 0.447052 | 0.4048801 | 10.90324  | 3.239314 | 0.857373 | 7.778187 | 1.58E-04  | 0.000560893 | 2.336662 |
| H2-Q6    | Adult Specific    | 0.044425 | 0.158122 | 0.177031 | 0.863039 | 1.161114 | 1.8928466 | 15.095    | 3.258086 | 0.696108 | 4.680434 | 2.86E-06  | 1.38E-05    | 4.875141 |
| Cngb3    | Adult Specific    | 1.227351 | 1.110954 | 0.505954 | 10.01575 | 7.835265 | 8.9411283 | 109.2937  | 3.27776  | 0.316785 | 10.34695 | 4.32E-25  | 1.10E-23    | 1.81894  |
| Acss1    | Adult Specific    | 13.20391 | 14.75251 | 17.72151 | 147.7261 | 152.9594 | 143.25414 | 4630.038  | 3.278224 | 0.143509 | 22.84328 | 1.70E-115 | 9.37E-113   | 10.81139 |
| Extl1    | Adult Specific    | 3.988533 | 4.958997 | 3.725525 | 41.10624 | 42.4837  | 40.157355 | 389.6989  | 3.280954 | 0.185759 | 17.66243 | 8.16E-70  | 1.26E-67    | 33.19399 |
| Usp18    | Adult Specific    | 0.274293 | 0.160574 | 0.230113 | 1.733718 | 1.823701 | 2.7423314 | 75.29791  | 3.283726 | 0.345381 | 9.507542 | 1.95E-21  | 4.05E-20    | 1.642572 |
| Oas1a    | Adult Specific    | 0.038903 | 0.060579 | 0.025837 | 0.377877 | 0.29656  | 0.552516  | 10.85061  | 3.285608 | 0.795669 | 4.129363 | 3.64E-05  | 0.00014496  | 1.237861 |
| Blk      | Adult Specific    | 0.3706   | 0.164884 | 0.302935 | 1.661437 | 3.10453  | 3.137821  | 47.86294  | 3.285675 | 0.4314   | 7.616303 | 2.61E-14  | 3.14E-13    | 76.15357 |
| Cebpb    | Adult Specific    | 2.64152  | 5.012476 | 4.058304 | 41.3115  |          |           |           |          |          |          |           |             |          |

|         |                |          |          |          |          |          |           |          |          |          |          |           |           |          |
|---------|----------------|----------|----------|----------|----------|----------|-----------|----------|----------|----------|----------|-----------|-----------|----------|
| Hspb8   | Adult Specific | 11.05782 | 17.27063 | 18.25125 | 218.2941 | 200.1768 | 215.58203 | 3669.838 | 3.760629 | 0.174555 | 21.54403 | 6.02E-103 | 2.46E-100 | 11.06769 |
| Slc38a3 | Adult Specific | 1.875206 | 1.379376 | 2.147662 | 27.46541 | 25.4313  | 20.551486 | 492.217  | 3.768988 | 0.204068 | 18.46928 | 3.65E-76  | 7.15E-74  | 5.88267  |
| Apol9a  | Adult Specific | 0.119599 | 0.079816 | 0        | 1.267323 | 0.390736 | 0.7431399 | 6.78763  | 3.773497 | 1.103477 | 3.419643 | 6.27E-04  | NA        | 1.782919 |
| Gbp6    | Adult Specific | 3.69212  | 8.635726 | 6.07194  | 80.10951 | 82.02378 | 97.196253 | 410.9172 | 3.77983  | 0.233787 | 16.16783 | 8.50E-59  | 9.35E-57  | 33.01104 |
| Klh133  | Adult Specific | 0.229338 | 0.395386 | 0.355403 | 4.657814 | 4.620426 | 4.7330797 | 81.62016 | 3.780534 | 0.326237 | 11.58829 | 4.72E-31  | 1.65E-29  | 920.2347 |
| lfit3   | Adult Specific | 0.195897 | 0.271154 | 0.115649 | 2.114245 | 2.891867 | 3.0140729 | 61.68787 | 3.783264 | 0.39273  | 9.633234 | 5.79E-22  | 1.24E-20  | 6.529621 |
| Cd52    | Adult Specific | 0.052134 | 0        | 0        | 0.276219 | 0.056775 | 0.1851095 | 3.414304 | 3.816458 | 1.594636 | 2.39331  | 1.67E-02  | NA        | 5.784355 |
| Kcnc2   | Adult Specific | 8.627301 | 2.709446 | 0.674099 | 74.38956 | 44.21298 | 45.047474 | 54.02432 | 3.83385  | 0.902115 | 4.249848 | 2.14E-05  | 8.87E-05  | 81.21156 |
| Scgb1c1 | Adult Specific | 0.724517 | 0.671554 | 0.801983 | 11.51593 | 8.679108 | 11.254626 | 86.98184 | 3.839856 | 0.321753 | 11.93417 | 7.85E-33  | 3.01E-31  | 9.806936 |
| Xdh     | Adult Specific | 3.134633 | 1.722782 | 1.102168 | 23.44651 | 26.10447 | 33.389689 | 150.4997 | 3.884822 | 0.310584 | 12.5081  | 6.74E-36  | 2.93E-34  | 36.9271  |
| Grm1    | Adult Specific | 0.808083 | 0.742245 | 0.634795 | 11.55516 | 12.20665 | 8.3762037 | 205.51   | 3.894512 | 0.245556 | 15.85996 | 1.20E-56  | 1.26E-54  | 6.792419 |

**GSEA Results:**

| <b>NAME</b>       | <b>ES</b> | <b>NES</b> | <b>NOM p-val</b> | <b>FDR q-val</b> | <b>FWER p-val</b> | <b>RANK AT MAX</b> |
|-------------------|-----------|------------|------------------|------------------|-------------------|--------------------|
| ADULT_SPECIFIC    | -0.42638  | -1.40688   | 0.1031746        | 0.088272         | 0.077             | 2640               |
| NEONATAL_SPECIFIC | 0.549873  | 1.755389   | 0                | 0.002466         | 0                 | 1753               |



**LEADING EDGE**

tags=44%, list=18%, signal=54%

tags=25%, list=12%, signal=28%

Suppl. Table 2. KEGG gene sets, downregulated genes, gene set size ≥30

| NAME                                                 | GS-> GS DETAILS SIZE | ES  | NES      | NOM p-val | FDR q-val | FWER p-val | RANK AT M LEADING EDGE |                                     |
|------------------------------------------------------|----------------------|-----|----------|-----------|-----------|------------|------------------------|-------------------------------------|
| KEGG_LYSINE_DEGRADATION                              | KEGG_l Details ...   | 41  | 0.592807 | 1.683484  | 0         | 0.339592   | 0.2                    | 1585 tags=44%, list=13%, signal=50% |
| KEGG_FATTY_ACID_METABOLISM                           | KEGG_f Details ...   | 33  | 0.668033 | 1.571423  | 0.012097  | 0.532321   | 0.411                  | 1426 tags=61%, list=12%, signal=69% |
| KEGG_FRUCTOSE_AND_MANNANOSE_METABOLISM               | KEGG_f Details ...   | 30  | 0.572357 | 1.551127  | 0.043564  | 0.407421   | 0.438                  | 3025 tags=60%, list=25%, signal=80% |
| KEGG_PYRUVATE_METABOLISM                             | KEGG_f Details ...   | 31  | 0.526278 | 1.524576  | 0.064202  | 0.39719    | 0.547                  | 2345 tags=48%, list=20%, signal=60% |
| KEGG_PPAR_SIGNALING_PATHWAY                          | KEGG_f Details ...   | 46  | 0.430718 | 1.479951  | 0.045817  | 0.467289   | 0.701                  | 1984 tags=43%, list=17%, signal=52% |
| KEGG_VALINE_LEUCINE_AND_ISOLEUCINE_DEGRADATION       | KEGG_l Details ...   | 40  | 0.671066 | 1.465588  | 0.032064  | 0.433986   | 0.739                  | 1762 tags=68%, list=15%, signal=79% |
| KEGG_AMINOACYL_TRNA_BIOSYNTHESIS                     | KEGG_l Details ...   | 41  | 0.534677 | 1.450052  | 0.119284  | 0.414999   | 0.793                  | 3849 tags=61%, list=32%, signal=90% |
| KEGG_GLYCEROLIPID_METABOLISM                         | KEGG_l Details ...   | 37  | 0.430296 | 1.412065  | 0.066536  | 0.471396   | 0.863                  | 1573 tags=30%, list=13%, signal=34% |
| KEGG_N_GLYCAN_BIOSYNTHESIS                           | KEGG_l Details ...   | 44  | 0.455345 | 1.39876   | 0.150495  | 0.450759   | 0.875                  | 3498 tags=48%, list=29%, signal=67% |
| KEGG_INSULIN_SIGNALING_PATHWAY                       | KEGG_l Details ...   | 122 | 0.346128 | 1.392863  | 0.032258  | 0.419585   | 0.878                  | 2654 tags=34%, list=22%, signal=43% |
| KEGG_GLYCOLYSIS_GLUUCONEOGENESIS                     | KEGG_l Details ...   | 42  | 0.517369 | 1.376088  | 0.163708  | 0.423962   | 0.89                   | 2276 tags=55%, list=19%, signal=67% |
| KEGG_INOSITOL_PHOSPHATE_METABOLISM                   | KEGG_l Details ...   | 50  | 0.407172 | 1.307431  | 0.126984  | 0.565588   | 0.959                  | 2671 tags=38%, list=22%, signal=49% |
| KEGG_ADIPOCYTOKINE_SIGNALING_PATHWAY                 | KEGG_l Details ...   | 58  | 0.340811 | 1.290978  | 0.06917   | 0.570873   | 0.976                  | 1531 tags=24%, list=13%, signal=28% |
| KEGG_GLYCEROPHOSPHOLIPID_METABOLISM                  | KEGG_l Details ...   | 64  | 0.37544  | 1.28277   | 0.210526  | 0.55534    | 0.979                  | 2697 tags=44%, list=23%, signal=56% |
| KEGG_ACUTE_MYELOID_LEUKEMIA                          | KEGG_l Details ...   | 55  | 0.368043 | 1.275204  | 0.117308  | 0.536679   | 0.979                  | 3880 tags=49%, list=32%, signal=72% |
| KEGG_PEROXISOME                                      | KEGG_f Details ...   | 70  | 0.436808 | 1.268622  | 0.274354  | 0.519206   | 0.981                  | 3125 tags=51%, list=26%, signal=69% |
| KEGG_NOTCH_SIGNALING_PATHWAY                         | KEGG_l Details ...   | 43  | 0.389224 | 1.264049  | 0.190661  | 0.501292   | 0.981                  | 1696 tags=26%, list=14%, signal=30% |
| KEGG_ARRHYTHMOGENIC_RIGHT_VENTRICULAR_CARDIOMYOPATHY | KEGG_l Details ...   | 57  | 0.386933 | 1.256059  | 0.243564  | 0.488583   | 0.985                  | 3171 tags=53%, list=27%, signal=71% |
| KEGG_AMINO_SUGAR_AND_NUCLEOTIDE_SUGAR_METABOLISM     | KEGG_l Details ...   | 39  | 0.378615 | 1.238459  | 0.197266  | 0.504581   | 0.989                  | 2264 tags=31%, list=19%, signal=38% |
| KEGG_LYSOSOME                                        | KEGG_l Details ...   | 106 | 0.326542 | 1.224987  | 0.231557  | 0.509073   | 0.989                  | 1548 tags=25%, list=13%, signal=29% |
| KEGG_TYPE_II_DIABETES_MELLITUS                       | KEGG_TYPE_II_DIAI    | 38  | 0.360432 | 1.219934  | 0.172745  | 0.496408   | 0.989                  | 1309 tags=24%, list=11%, signal=27% |
| KEGG_HYPERTROPHIC_CARDIOMYOPATHY_HCM                 | KEGG_HYPERTROPI      | 64  | 0.336661 | 1.173646  | 0.266802  | 0.572496   | 0.992                  | 2730 tags=45%, list=23%, signal=58% |
| KEGG_JAK_STAT_SIGNALING_PATHWAY                      | KEGG_JAK_STAT_SI     | 86  | 0.307079 | 1.169327  | 0.190381  | 0.555459   | 0.995                  | 1550 tags=21%, list=13%, signal=24% |
| KEGG_BASAL_CELL_CARCINOMA                            | KEGG_BASAL_CELL      | 36  | 0.349466 | 1.146692  | 0.29783   | 0.581564   | 0.998                  | 2389 tags=36%, list=20%, signal=45% |
| KEGG_CARDIAC_MUSCLE_CONTRACTION                      | KEGG_CARDIAC_MI      | 57  | 0.413135 | 1.131638  | 0.341176  | 0.589924   | 1                      | 2620 tags=46%, list=22%, signal=58% |
| KEGG_BASE_EXCISION_REPAIR                            | KEGG_BASE_EXCISI     | 32  | 0.341352 | 1.120402  | 0.310345  | 0.597222   | 1                      | 3150 tags=38%, list=26%, signal=51% |
| KEGG_TOLL_LIKE_RECEPTOR_SIGNALING_PATHWAY            | KEGG_TOLL_LIKE_R     | 68  | 0.275811 | 1.118124  | 0.244533  | 0.580034   | 1                      | 2072 tags=24%, list=17%, signal=28% |
| KEGG_PURINE_METABOLISM                               | KEGG_PURINE_MEI      | 129 | 0.23339  | 1.103407  | 0.28373   | 0.591158   | 1                      | 2544 tags=26%, list=21%, signal=33% |
| KEGG_DILATED_CARDIOMYOPATHY                          | KEGG_DILATED_CA      | 69  | 0.322527 | 1.097032  | 0.371951  | 0.586362   | 1                      | 2776 tags=43%, list=23%, signal=56% |
| KEGG_ARGININE_AND_PROLINE_METABOLISM                 | KEGG_ARGININE_A      | 42  | 0.31215  | 1.088698  | 0.389113  | 0.584618   | 1                      | 1674 tags=33%, list=14%, signal=39% |
| KEGG_CALCIIUM_SIGNALING_PATHWAY                      | KEGG_CALCIIUM_SI     | 119 | 0.266505 | 1.070079  | 0.38716   | 0.60083    | 1                      | 2676 tags=32%, list=22%, signal=41% |
| KEGG_CYTOSOLIC_DNA_SENSING_PATHWAY                   | KEGG_CYTOSOLIC_I     | 31  | 0.278077 | 1.052943  | 0.329243  | 0.616653   | 1                      | 2738 tags=32%, list=23%, signal=42% |
| KEGG_PHOSPHATIDYLINOSITOL_SIGNALING_SYSTEM           | KEGG_PHOSPHATID      | 69  | 0.307043 | 1.028095  | 0.442857  | 0.646768   | 1                      | 2822 tags=32%, list=24%, signal=41% |
| KEGG_RIG_I_LIKE_RECEPTOR_SIGNALING_PATHWAY           | KEGG_RIG_I_LIKE_I    | 46  | 0.254549 | 0.995019  | 0.457831  | 0.695406   | 1                      | 1032 tags=13%, list=9%, signal=14%  |
| KEGG_ENDOCYTOSIS                                     | KEGG_ENDOCYTOSI      | 160 | 0.24393  | 0.991079  | 0.45      | 0.682946   | 1                      | 2766 tags=26%, list=23%, signal=33% |
| KEGG_APOPTOSIS                                       | KEGG_APOPTOSIS       | 73  | 0.244961 | 0.978839  | 0.500994  | 0.686473   | 1                      | 1118 tags=14%, list=9%, signal=15%  |
| KEGG_COMPLEMENT_AND_COAGULATION_CASCADES             | KEGG_COMPLEMENT      | 32  | 0.357117 | 0.970396  | 0.506122  | 0.686111   | 1                      | 4042 tags=59%, list=34%, signal=89% |
| KEGG_ALDOSTERONE_REGULATED_SODIUM_REABSORPTION       | KEGG_ALDOSTEROI      | 32  | 0.294164 | 0.942225  | 0.548193  | 0.720594   | 1                      | 2590 tags=34%, list=22%, signal=44% |
| KEGG_NON_SMALL_CELL_LUNG_CANCER                      | KEGG_NON_SMALL       | 52  | 0.266024 | 0.938276  | 0.551657  | 0.710578   | 1                      | 3967 tags=42%, list=33%, signal=63% |
| KEGG_MTOR_SIGNALING_PATHWAY                          | KEGG_MTOR_SIGNI      | 48  | 0.274736 | 0.935289  | 0.581028  | 0.697672   | 1                      | 2505 tags=27%, list=21%, signal=34% |
| KEGG_PROGESTERONE_MEDIATED_OOCYTE_MATURATION         | KEGG_PROGESTERON     | 73  | 0.239328 | 0.93502   | 0.528689  | 0.681346   | 1                      | 3432 tags=34%, list=29%, signal=48% |
| KEGG_ABC_TRANSPORTERS                                | KEGG_ABC_TRANSF      | 30  | 0.32999  | 0.926857  | 0.528487  | 0.68078    | 1                      | 2545 tags=50%, list=21%, signal=63% |
| KEGG_MAPK_SIGNALING_PATHWAY                          | KEGG_MAPK_SIGNI      | 209 | 0.204587 | 0.884609  | 0.65286   | 0.740458   | 1                      | 2963 tags=28%, list=25%, signal=37% |
| KEGG_NOD_LIKE_RECEPTOR_SIGNALING_PATHWAY             | KEGG_NOD_LIKE_R      | 44  | 0.240114 | 0.803455  | 0.745902  | 0.871872   | 1                      | 3347 tags=36%, list=28%, signal=50% |
| KEGG_VIBRIO_CHOLERAE_INFECTION                       | KEGG_VIBRIO_CHO      | 43  | 0.193894 | 0.789756  | 0.78373   | 0.875268   | 1                      | 2776 tags=26%, list=23%, signal=33% |
| KEGG_LEISHMANIA_INFECTION                            | KEGG_LEISHMANIA      | 44  | 0.211744 | 0.762049  | 0.810811  | 0.896746   | 1                      | 2703 tags=30%, list=23%, signal=38% |
| KEGG_DNA_REPLICATION                                 | KEGG_DNA_REPLIC      | 35  | 0.215697 | 0.749998  | 0.863821  | 0.894857   | 1                      | 3112 tags=37%, list=26%, signal=50% |
| KEGG_WNT_SIGNALING_PATHWAY                           | KEGG_WNT_SIGNA       | 122 | 0.184617 | 0.73339   | 0.901575  | 0.897137   | 1                      | 2413 tags=22%, list=20%, signal=27% |
| KEGG_ALZHEIMERS_DISEASE                              | KEGG_ALZHEIMERS      | 135 | 0.195091 | 0.624804  | 0.780684  | 0.988661   | 1                      | 4076 tags=37%, list=34%, signal=56% |
| KEGG_ENDOMETRIAL_CANCER                              | KEGG_ENDOMETRI       | 49  | 0.166942 | 0.598714  | 0.913386  | 0.986378   | 1                      | 3926 tags=37%, list=33%, signal=54% |
| KEGG_OXIDATIVE_PHOSPHORYLATION                       | KEGG_OXIDATIVE_I     | 96  | 0.220602 | 0.514837  | 0.875     | 0.999012   | 1                      | 2878 tags=24%, list=24%, signal=31% |
| KEGG_PARKINSONS_DISEASE                              | KEGG_PARKINSONS      | 102 | 0.170388 | 0.42934   | 0.939024  | 0.99346    | 1                      | 2876 tags=23%, list=24%, signal=29% |

### Suppl. Table 3. Oligos used in this study

| Name            | Sequence                                                                                                          | Purpose/notes                                                                                                                                                               |
|-----------------|-------------------------------------------------------------------------------------------------------------------|-----------------------------------------------------------------------------------------------------------------------------------------------------------------------------|
| gRNA oligo pool | GCAGATGGCTCTTTGTCCTAG <b>GCTCTTCA</b><br>ACCGNNNNNNNNNNNNNNNNNNNNNGTT <b>GG</b><br><b>AAGAGC</b> GTCTTCTGACCGTCGC | 14,664 oligos synthesized as a pool. Variable gRNA = NNN. After amplification library was digested with Sapl (bold sites), and cloned into CASA AV vector (Addgene 132551). |
| LibAmp-F        | CGTCAGTACAGATCGATTACCTACGGAGT<br>AGACCTGACGCGATGACCTTAACGATAAC<br>AGGCAGATGGCTCTTTGTCCTA                          | Amplification of gRNA oligo pool                                                                                                                                            |
| LibAmp-R        | TTAGCTCGATAGCAGGACAGATCGTTACA<br>GCTTAACTAGCCCAGCCTAGTGTGGATAA<br>CGGCGACGGTCAGAAGACGCTC                          | Amplification of gRNA oligo pool                                                                                                                                            |
| TnT.titer-F     | TCGGGATAAAAGCAGTCTGG                                                                                              | qPCR titer of AAV containing gallus TnT promoter                                                                                                                            |
| TnT.titer-R     | CCCAAGCTATTGTGTGGCCT                                                                                              | qPCR titer of AAV containing gallus TnT promoter                                                                                                                            |
| gRNA.RT         | TTTTCAAGTTGATAACGGAC                                                                                              | reverse transcription of gRNAs                                                                                                                                              |
| gRNA.Adapter-F  | AATGATACGGCGACCACCGAGATCTACAC<br>TCTTTCCCTACACGACGCTCTTCCGATCT<br>AAGCAGTGGTATCAACGCAG                            | full length forward adapter, used in first and second round of amplification for gRNA amplicon-seq                                                                          |
| gRNA.Adapt.R1-R | CTGGAGTTCAGACGTGTGCTCTTCCGATC<br>TAAGTTGATAACGGACTAGCC                                                            | half of reverse adapter, used in first round of amplification for gRNA amplicon-seq                                                                                         |
| gRNA.Adapt.R2-R | CAAGCAGAAGACGGCATAACGAGATNNNNN<br>NGTGACTGGAGTTCAGACGT                                                            | second half of reverse adapter, used in second round of amplification for gRNA amplicon-seq. NNNNNN = variable multiplexing index.                                          |

**Suppl. Table 4. Antibodies used in this study.**

| <b>Antigen</b>           | <b>Host</b> | <b>Vendor</b>     | <b>Cat. #</b> | <b>Working Concentration</b>       | <b>Application</b> |
|--------------------------|-------------|-------------------|---------------|------------------------------------|--------------------|
| Sarcomeric alpha actinin | Mouse       | Abcam             | ab9465        | 1:500                              | IF                 |
| Cav3                     | Rabbit      | Life Technologies | PA1066        | 1:500                              | IF                 |
| Nppa                     | Rabbit      | Abgent            | AP8534A       | 1:500                              | IF                 |
| H2Bub1                   | Rabbit      | Cell Signaling    | 5546          | 1:250; after SDS antigen retrieval | IF                 |
| Nppa                     | Rabbit      | Abgent            | AP8534A       | 1:2000                             | Western            |
| H2Bub1                   | Rabbit      | Cell Signaling    | 5546          | 1:1000                             | Western            |
| GAPDH                    | Rabbit      | Santa Cruz        | SC-25778      | 1:1000                             | Western            |
| H2Bub1                   | Rabbit      | Cell Signaling    | 5546          | 5ul + 90ul Dynabeads               | ChIP               |
| H3K4me3                  | Rabbit      | Active Motif      | 39159         | 3ul + 90ul Dynabeads               | ChIP               |
| H3K36me3                 | Rabbit      | Cell Signaling    | 4909S         | 5ul + 90ul Dynabeads               | ChIP               |
